# Supplementary material for: Sclerostin Depletion Induces Inflammation in the Bone Marrow of Mice
Source: Int J Mol Sci. 2021 Aug 24;22(17):9111. doi: 10.3390/ijms22179111 (PMC8431516; doi:10.3390/ijms22179111)

## SUPPLEMENTARY MATERIALS

### Supplemental Materials and Methods

*Bone digestion for quantitative real-time PCR.* Bone digests to obtain MSC, OBs, ECs and enriched osteocytes was performed similar to Schepers et al. (1). Femurs and tibias were harvested in 1x HBSS without serum and crushed using a mortar and pestle. Bone marrow was washed away and the bone chips were then incubated with 3mg/ml Type I Collagenase in HBSS without serum (Worthington) at 37°C on a shaker at 110 rpm for 1 hour. After incubation the supernatant was harvested from the bone chips, filtered through a 70 um cell strainer, and then washed with 1x HBSS-2% FCS to stop the action of the collagenase. Cells were centrifuged at 300-500 x g for 5 minutes to wash, resuspended in 1x HBSS-2% FCS, and cell counts performed using Trypan Blue staining on a hemacytometer. Cells were then stained for flow cytometry with antibodies to lineage-positive cells (CD3, CD4, CD8, CD11b, CD19, NK1.1, GR1 and TER119, all in PE-Cy7), CD45-eFluor450, Sca1-FITC, CD31-APC, CD51-biotin followed by streptavidin-PE. PI was added as viability marker. Cells were sorted using a FACS Aria III and cell pellets stored for real-time PCR.

*Real-time PCR.* LT-HSCs were purified from pooled BM from control and *Sost*<sup>-/-</sup> long bones by flow cytometry, as described in the main text. Cells were pelleted and resuspended in RNeasy Lysis Buffer with 2-mercaptoethanol (Qiagen). Total RNA was purified using Qiagen RNeasy Micro Kit (Qiagen) according to manufacturer's protocol. RNA concentration and purity was analyzed using a NanoDrop ND-1000 Spectrophotometer (Thermo Fisher Scientific). The same amount of RNA from each sample was mixed with qScript XLT-1 Step, RT-qPCR ToughMix (Quantabio Cat. 66149433) together with specific TaqMan expression assays. Real-time quantitative PCR was ran on an Applied Biosystems thermocycler in this sequence: 1 cycles at 50°C for 10 minutes for cDNA synthesis, 1 cycle at 95°C for 1 minute for initial denaturation and then 40 cycles of amplification at 95°C for 5 seconds then 60°C for 45 seconds, using QuantStudio 3 software (ThermoFisher). The following TaqMan gene expression assays (Thermo Fisher Scientific) were used: HoxB4-FAM (Mm00657964\_m1), p21/Cip1/Cdkn1a-FAM (Mm00432448\_m1), and GAPDH-VIC (MM999915\_g1). Expression of HoxB4 and p21/Cip1 in KO LT-HSCs relative to the average WT gene expression was calculated using the double delta Ct method (2). RNA from digested bones and qPCR for CXCL12 and SCF was performed as described in Cain and Manilay (3).

*Cell cycle analysis after 5-fluorouracil treatment.* B6 and *Sost*<sup>-/-</sup> mice (16-18 weeks of age) were injected with PBS or 100mg/kg 5-fluorouracil (Sigma) intraperitoneally. Seven days later, mice were euthanized and bone marrow cells were harvested for flow cytometry as described above. First, cells were

extracellularly stained with anti-Lineage, Sca-1 and cKit antibodies, and then fixed and permeabilized using the eBioscience™ Foxp3 / Transcription Factor Staining Buffer Set for intranuclear staining. Cells were stained on ice for 30 minutes in the dark with anti-Ki67-PE (clone SolA15) or isotype-PE control mAb, purchased from eBioscience. After incubation, cells were washed twice with permeabilization buffer, resuspended in 400µl FACS buffer and transferred to tubes for acquisition on the LSR II. DAPI was added to the samples at a final concentration of 1.0 ug/ml immediately before acquisition.

**Table S1.** Ontologies associated with genes highly expressed in LT-HSCs sorted from WT→*Sost*<sup>-/-</sup> hematopoietic chimeras compared to LT-HSCs sorted from WT→WT hematopoietic chimeras

| GO ID      | Term                                                                                                                      | FDR      | No of genes |
|------------|---------------------------------------------------------------------------------------------------------------------------|----------|-------------|
| GO:0002526 | acute inflammatory response                                                                                               | 2.24E-07 | 17          |
| GO:0002250 | adaptive immune response                                                                                                  | 1.19E-12 | 56          |
| GO:0002460 | adaptive immune response based on somatic recombination of immune receptors built from immunoglobulin superfamily domains | 5.15E-11 | 38          |
| GO:0046631 | alpha-beta T cell activation                                                                                              | 2.16E-09 | 23          |
| GO:0001525 | angiogenesis                                                                                                              | 1.27E-08 | 44          |
| GO:0042113 | B cell activation                                                                                                         | 2.41E-15 | 41          |
| GO:0042100 | B cell proliferation                                                                                                      | 1.60E-09 | 18          |
| GO:0050853 | B cell receptor signaling pathway                                                                                         | 5.20E-07 | 17          |
| GO:0022610 | biological adhesion                                                                                                       | 2.13E-18 | 99          |
| GO:0001568 | blood vessel development                                                                                                  | 9.60E-08 | 50          |
| GO:0048514 | blood vessel morphogenesis                                                                                                | 6.13E-09 | 49          |
| GO:0045453 | bone resorption                                                                                                           | 1.30E-06 | 13          |
| GO:0035710 | CD4-positive, alpha-beta T cell activation                                                                                | 1.09E-07 | 17          |
| GO:0001775 | cell activation                                                                                                           | 1.38E-51 | 153         |
| GO:0002263 | cell activation involved in immune response                                                                               | 3.99E-30 | 83          |
| GO:0007155 | cell adhesion                                                                                                             | 1.58E-18 | 99          |
| GO:0060326 | cell chemotaxis                                                                                                           | 7.63E-10 | 32          |
| GO:0016477 | cell migration                                                                                                            | 7.06E-12 | 93          |
| GO:0098609 | cell-cell adhesion                                                                                                        | 1.18E-13 | 66          |
| GO:0006968 | cellular defense response                                                                                                 | 2.25E-06 | 11          |
| GO:0019725 | cellular homeostasis                                                                                                      | 1.74E-07 | 58          |
| GO:0006873 | cellular ion homeostasis                                                                                                  | 2.17E-06 | 43          |
| GO:0062197 | cellular response to chemical stress                                                                                      | 1.31E-06 | 29          |
| GO:0071345 | cellular response to cytokine stimulus                                                                                    | 1.02E-17 | 83          |
| GO:0034599 | cellular response to oxidative stress                                                                                     | 1.01E-06 | 27          |
| GO:1901701 | cellular response to oxygen-containing compound                                                                           | 5.73E-07 | 64          |
| GO:0048878 | chemical homeostasis                                                                                                      | 3.27E-07 | 66          |
| GO:0006935 | chemotaxis                                                                                                                | 1.32E-10 | 50          |
| GO:0001816 | cytokine production                                                                                                       | 5.73E-17 | 73          |
| GO:0019221 | cytokine-mediated signaling pathway                                                                                       | 7.12E-12 | 57          |
| GO:0006952 | defense response                                                                                                          | 1.32E-26 | 128         |
| GO:0098542 | defense response to other organism                                                                                        | 2.93E-10 | 71          |
| GO:0140029 | exocytic process                                                                                                          | 1.95E-21 | 80          |
| GO:0006887 | exocytosis                                                                                                                | 1.95E-21 | 80          |
| GO:0140352 | export from cell                                                                                                          | 1.17E-22 | 107         |
| GO:0036230 | granulocyte activation                                                                                                    | 6.75E-27 | 65          |
| GO:0071621 | granulocyte chemotaxis                                                                                                    | 3.28E-08 | 19          |

|            |                                                     |          |     |
|------------|-----------------------------------------------------|----------|-----|
| GO:0097530 | granulocyte migration                               | 2.41E-08 | 21  |
| GO:0048534 | hematopoietic or lymphoid organ development         | 3.86E-21 | 86  |
| GO:0030097 | hemopoiesis                                         | 1.57E-20 | 83  |
| GO:0006959 | humoral immune response                             | 3.05E-08 | 33  |
| GO:0002252 | immune effector process                             | 7.47E-33 | 117 |
| GO:0002520 | immune system development                           | 9.98E-21 | 88  |
| GO:0006954 | inflammatory response                               | 6.12E-24 | 79  |
| GO:0045087 | innate immune response                              | 8.63E-09 | 59  |
| GO:0098771 | inorganic ion homeostasis                           | 2.43E-06 | 46  |
| GO:0050801 | ion homeostasis                                     | 1.68E-06 | 48  |
| GO:0045321 | leukocyte activation                                | 4.78E-53 | 147 |
| GO:0002366 | leukocyte activation involved in immune response    | 3.11E-30 | 83  |
| GO:0071887 | leukocyte apoptotic process                         | 2.43E-06 | 16  |
| GO:0007159 | leukocyte cell-cell adhesion                        | 6.37E-18 | 47  |
| GO:0030595 | leukocyte chemotaxis                                | 4.13E-10 | 28  |
| GO:0043299 | leukocyte degranulation                             | 1.03E-26 | 67  |
| GO:0002521 | leukocyte differentiation                           | 2.62E-22 | 65  |
| GO:0002443 | leukocyte mediated immunity                         | 6.05E-32 | 95  |
| GO:0050900 | leukocyte migration                                 | 5.88E-16 | 52  |
| GO:0070661 | leukocyte proliferation                             | 8.63E-19 | 46  |
| GO:0046649 | lymphocyte activation                               | 1.44E-28 | 86  |
| GO:0002285 | lymphocyte activation involved in immune response   | 9.81E-07 | 21  |
| GO:0030098 | lymphocyte differentiation                          | 4.93E-14 | 43  |
| GO:0002449 | lymphocyte mediated immunity                        | 7.17E-08 | 32  |
| GO:0046651 | lymphocyte proliferation                            | 3.55E-17 | 42  |
| GO:0000165 | MAPK cascade                                        | 2.51E-08 | 57  |
| GO:0061025 | membrane fusion                                     | 1.28E-19 | 84  |
| GO:1903131 | mononuclear cell differentiation                    | 3.19E-16 | 49  |
| GO:0071674 | mononuclear cell migration                          | 1.82E-06 | 20  |
| GO:0032943 | mononuclear cell proliferation                      | 1.40E-18 | 44  |
| GO:0048871 | multicellular organismal homeostasis                | 4.44E-07 | 38  |
| GO:0072674 | multinuclear osteoclast differentiation             | 9.73E-07 | 6   |
| GO:0002275 | myeloid cell activation involved in immune response | 5.00E-26 | 67  |
| GO:0030099 | myeloid cell differentiation                        | 9.85E-11 | 41  |
| GO:0002274 | myeloid leukocyte activation                        | 2.11E-32 | 83  |
| GO:0002573 | myeloid leukocyte differentiation                   | 1.36E-12 | 31  |
| GO:0002444 | myeloid leukocyte mediated immunity                 | 1.25E-28 | 71  |
| GO:0097529 | myeloid leukocyte migration                         | 6.83E-09 | 26  |
| GO:0050866 | negative regulation of cell activation              | 5.66E-08 | 24  |
| GO:0007162 | negative regulation of cell adhesion                | 1.39E-08 | 30  |
| GO:0022408 | negative regulation of cell-cell adhesion           | 1.22E-06 | 21  |

|            |                                                          |          |    |
|------------|----------------------------------------------------------|----------|----|
| GO:0001818 | negative regulation of cytokine production               | 6.74E-07 | 30 |
| GO:0002683 | negative regulation of immune system process             | 4.72E-13 | 43 |
| GO:0002695 | negative regulation of leukocyte activation              | 6.62E-09 | 24 |
| GO:0051250 | negative regulation of lymphocyte activation             | 3.55E-08 | 21 |
| GO:0051241 | negative regulation of multicellular organismal process  | 1.11E-06 | 62 |
| GO:0032102 | negative regulation of response to external stimulus     | 1.28E-08 | 35 |
| GO:0048585 | negative regulation of response to stimulus              | 3.88E-07 | 84 |
| GO:0042119 | neutrophil activation                                    | 3.64E-27 | 65 |
| GO:0002283 | neutrophil activation involved in immune response        | 1.64E-25 | 62 |
| GO:0030593 | neutrophil chemotaxis                                    | 5.88E-08 | 17 |
| GO:0043312 | neutrophil degranulation                                 | 1.03E-25 | 62 |
| GO:0002446 | neutrophil mediated immunity                             | 7.59E-28 | 66 |
| GO:1990266 | neutrophil migration                                     | 3.28E-08 | 19 |
| GO:0048284 | organelle fusion                                         | 1.38E-19 | 81 |
| GO:0090174 | organelle membrane fusion                                | 7.76E-20 | 80 |
| GO:0030316 | osteoclast differentiation                               | 2.19E-06 | 15 |
| GO:0006909 | phagocytosis                                             | 4.55E-08 | 32 |
| GO:0006911 | phagocytosis, engulfment                                 | 1.85E-06 | 16 |
| GO:0002675 | positive regulation of acute inflammatory response       | 1.25E-07 | 10 |
| GO:0043085 | positive regulation of catalytic activity                | 4.58E-07 | 73 |
| GO:0050867 | positive regulation of cell activation                   | 5.80E-14 | 45 |
| GO:0045785 | positive regulation of cell adhesion                     | 2.68E-13 | 45 |
| GO:0010647 | positive regulation of cell communication                | 4.16E-10 | 93 |
| GO:0008284 | positive regulation of cell population proliferation     | 9.15E-08 | 59 |
| GO:0022409 | positive regulation of cell-cell adhesion                | 2.88E-14 | 37 |
| GO:0001819 | positive regulation of cytokine production               | 6.95E-10 | 41 |
| GO:0031349 | positive regulation of defense response                  | 1.22E-07 | 31 |
| GO:0051094 | positive regulation of developmental process             | 3.43E-07 | 71 |
| GO:0010628 | positive regulation of gene expression                   | 1.20E-08 | 68 |
| GO:1903708 | positive regulation of hemopoiesis                       | 1.95E-11 | 26 |
| GO:0002922 | positive regulation of humoral immune response           | 1.31E-06 | 8  |
| GO:0002699 | positive regulation of immune effector process           | 2.58E-07 | 24 |
| GO:0050778 | positive regulation of immune response                   | 1.32E-10 | 54 |
| GO:0002684 | positive regulation of immune system process             | 6.11E-21 | 87 |
| GO:0050729 | positive regulation of inflammatory response             | 7.98E-10 | 22 |
| GO:1902533 | positive regulation of intracellular signal transduction | 5.67E-11 | 67 |
| GO:0002696 | positive regulation of leukocyte activation              | 1.58E-14 | 45 |
| GO:1903039 | positive regulation of leukocyte cell-cell adhesion      | 2.11E-13 | 33 |
| GO:1902107 | positive regulation of leukocyte differentiation         | 1.95E-11 | 26 |
| GO:0070665 | positive regulation of leukocyte proliferation           | 2.28E-06 | 18 |
| GO:0051251 | positive regulation of lymphocyte activation             | 7.57E-12 | 38 |

|            |                                                                  |          |     |
|------------|------------------------------------------------------------------|----------|-----|
| GO:0045621 | positive regulation of lymphocyte differentiation                | 1.02E-06 | 16  |
| GO:0043410 | positive regulation of MAPK cascade                              | 2.58E-07 | 39  |
| GO:0051240 | positive regulation of multicellular organismal process          | 3.57E-13 | 92  |
| GO:0045639 | positive regulation of myeloid cell differentiation              | 6.69E-08 | 17  |
| GO:0002763 | positive regulation of myeloid leukocyte differentiation         | 1.91E-06 | 12  |
| GO:0045937 | positive regulation of phosphate metabolic process               | 5.75E-07 | 57  |
| GO:0010562 | positive regulation of phosphorus metabolic process              | 5.75E-07 | 57  |
| GO:0042327 | positive regulation of phosphorylation                           | 2.43E-07 | 55  |
| GO:0001934 | positive regulation of protein phosphorylation                   | 8.88E-08 | 53  |
| GO:0032103 | positive regulation of response to external stimulus             | 8.86E-09 | 40  |
| GO:0009967 | positive regulation of signal transduction                       | 8.86E-10 | 85  |
| GO:0023056 | positive regulation of signaling                                 | 4.61E-10 | 93  |
| GO:0050870 | positive regulation of T cell activation                         | 1.32E-10 | 28  |
| GO:0051050 | positive regulation of transport                                 | 2.19E-06 | 54  |
| GO:0006468 | protein phosphorylation                                          | 1.35E-06 | 77  |
| GO:0045055 | regulated exocytosis                                             | 7.67E-22 | 75  |
| GO:0002673 | regulation of acute inflammatory response                        | 1.74E-07 | 12  |
| GO:0002819 | regulation of adaptive immune response                           | 3.33E-07 | 21  |
| GO:0046634 | regulation of alpha-beta T cell activation                       | 5.92E-07 | 16  |
| GO:0045765 | regulation of angiogenesis                                       | 2.39E-06 | 28  |
| GO:0050864 | regulation of B cell activation                                  | 2.57E-10 | 26  |
| GO:0050865 | regulation of cell activation                                    | 1.17E-25 | 75  |
| GO:0030155 | regulation of cell adhesion                                      | 3.11E-19 | 70  |
| GO:0045595 | regulation of cell differentiation                               | 5.53E-08 | 84  |
| GO:0042127 | regulation of cell population proliferation                      | 1.45E-12 | 100 |
| GO:0022407 | regulation of cell-cell adhesion                                 | 9.93E-17 | 50  |
| GO:0001817 | regulation of cytokine production                                | 5.80E-14 | 64  |
| GO:0031347 | regulation of defense response                                   | 4.65E-13 | 57  |
| GO:0002604 | regulation of dendritic cell antigen processing and presentation | 1.90E-06 | 6   |
| GO:0071622 | regulation of granulocyte chemotaxis                             | 3.14E-07 | 12  |
| GO:1903706 | regulation of hemopoiesis                                        | 2.76E-14 | 46  |
| GO:0002697 | regulation of immune effector process                            | 1.65E-10 | 42  |
| GO:0050776 | regulation of immune response                                    | 5.45E-19 | 80  |
| GO:0002682 | regulation of immune system process                              | 7.47E-33 | 132 |
| GO:0050727 | regulation of inflammatory response                              | 1.02E-13 | 42  |
| GO:0002694 | regulation of leukocyte activation                               | 1.65E-27 | 75  |
| GO:2000106 | regulation of leukocyte apoptotic process                        | 8.20E-07 | 15  |
| GO:1903037 | regulation of leukocyte cell-cell adhesion                       | 1.34E-16 | 43  |
| GO:0002688 | regulation of leukocyte chemotaxis                               | 3.80E-07 | 17  |
| GO:1902105 | regulation of leukocyte differentiation                          | 6.85E-14 | 38  |
| GO:0002685 | regulation of leukocyte migration                                | 1.30E-08 | 25  |

|            |                                                    |          |     |
|------------|----------------------------------------------------|----------|-----|
| GO:0070663 | regulation of leukocyte proliferation              | 6.48E-13 | 33  |
| GO:0051249 | regulation of lymphocyte activation                | 3.05E-22 | 62  |
| GO:0045619 | regulation of lymphocyte differentiation           | 1.45E-09 | 25  |
| GO:0050670 | regulation of lymphocyte proliferation             | 2.07E-12 | 31  |
| GO:0043408 | regulation of MAPK cascade                         | 1.66E-06 | 45  |
| GO:0032944 | regulation of mononuclear cell proliferation       | 4.72E-13 | 32  |
| GO:2000026 | regulation of multicellular organismal development | 1.70E-11 | 86  |
| GO:0045637 | regulation of myeloid cell differentiation         | 4.47E-08 | 27  |
| GO:0002761 | regulation of myeloid leukocyte differentiation    | 4.08E-08 | 19  |
| GO:0090022 | regulation of neutrophil chemotaxis                | 2.97E-07 | 10  |
| GO:1902622 | regulation of neutrophil migration                 | 9.20E-08 | 12  |
| GO:0001932 | regulation of protein phosphorylation              | 1.29E-06 | 64  |
| GO:0032101 | regulation of response to external stimulus        | 2.95E-18 | 82  |
| GO:0080134 | regulation of response to stress                   | 8.03E-11 | 82  |
| GO:0051046 | regulation of secretion                            | 1.65E-06 | 44  |
| GO:0050863 | regulation of T cell activation                    | 3.00E-16 | 43  |
| GO:0045580 | regulation of T cell differentiation               | 8.30E-07 | 19  |
| GO:0042129 | regulation of T cell proliferation                 | 1.47E-09 | 24  |
| GO:0009617 | response to bacterium                              | 7.94E-14 | 61  |
| GO:0009607 | response to biotic stimulus                        | 5.09E-16 | 100 |
| GO:0034097 | response to cytokine                               | 2.46E-17 | 86  |
| GO:0043207 | response to external biotic stimulus               | 3.36E-16 | 99  |
| GO:0032496 | response to lipopolysaccharide                     | 1.60E-09 | 33  |
| GO:0002237 | response to molecule of bacterial origin           | 1.60E-09 | 34  |
| GO:0051707 | response to other organism                         | 3.19E-16 | 99  |
| GO:0006979 | response to oxidative stress                       | 4.26E-07 | 35  |
| GO:1901700 | response to oxygen-containing compound             | 3.79E-08 | 85  |
| GO:0046903 | secretion                                          | 1.05E-22 | 111 |
| GO:0032940 | secretion by cell                                  | 3.41E-22 | 104 |
| GO:0042110 | T cell activation                                  | 6.40E-19 | 57  |
| GO:0030217 | T cell differentiation                             | 1.07E-09 | 30  |
| GO:0042098 | T cell proliferation                               | 1.93E-11 | 29  |
| GO:0042330 | taxis                                              | 5.14E-11 | 51  |
| GO:0048771 | tissue remodeling                                  | 1.71E-06 | 21  |
| GO:0035295 | tube development                                   | 7.48E-07 | 63  |
| GO:0035239 | tube morphogenesis                                 | 1.56E-06 | 54  |
| GO:0001944 | vasculature development                            | 3.43E-07 | 50  |
| GO:0006906 | vesicle fusion                                     | 5.54E-20 | 80  |
| GO:0099500 | vesicle fusion to plasma membrane                  | 1.95E-21 | 80  |
| GO:0016050 | vesicle organization                               | 2.41E-19 | 110 |

**Table S2.** Gene lists for selected upregulated ontologies highly expressed in LT-HSCs sorted from WT→*Sost*<sup>-/-</sup> hematopoietic chimeras compared to LT-HSCs sorted from WT→WT hematopoietic chimeras

| GO ID      | Term                                | Gene names                                                                                                                                                                                                                                                                                                                                                                                                                                                                                                                                                                                                                                                                                                                                                                                                   |
|------------|-------------------------------------|--------------------------------------------------------------------------------------------------------------------------------------------------------------------------------------------------------------------------------------------------------------------------------------------------------------------------------------------------------------------------------------------------------------------------------------------------------------------------------------------------------------------------------------------------------------------------------------------------------------------------------------------------------------------------------------------------------------------------------------------------------------------------------------------------------------|
| GO:0002682 | regulation of immune system process | Hfe Cebpb Mzb1 H2-DMb2 Dapk2 Oscar Blnk Ets1 Cd83 Adam8 Slc7a11 Vpreb3 Acod1 Haver1 Pram1 Trem14 Cadm1 Fcer1a Fcer2a Cd101 Grap2 Lpxn Zc3h12d Slc9b2 Fes Ccl4 Ccl5 Ccr7 Gpnmb Mmp8 Mmp9 Mmp14 Hspa1a Hspa1b Alox15 Mpp1 Ikzf3 Pilra Anxa1 Fpr1 Fpr2 Id2 Btla Samhd1 Pparg Zap70 Arg2 Rhog Slc11a1 Csf3r Ighd Tnfsf13b Myo1f Prkcb Card11 Igcl1 Igcl2 Igcl3 Igl11 Il1b Scin Cd300e Il6 Il7r Ocstamp Cxcr2 Tarm1 Spi1 Inhba Sptal Irf4 Destamp Itgal Il18rap Sit1 Itgb2 Vsir Ceacam1 Prdm1 Nod2 Blk Clec4e Pla2g2d Bst1 C1qc C3 C5ar1 Bank1 Rac2 Pla2g7 Rag1 Tnfaip8l2 Cxcr3 Gpr18 Rara Pglyrp1 Ighv1-18 Nlr1 Cav1 Adtrp Nfam1 Ldlr Trdc Ifnlr1 Tfric Rasgrp1 Thbs1 Cd2 Cd3d Cd3e Cd300ld Cd5 Cd8b1 Cd19 Ms4a1 Cd22 Cd80 Gpr68 Cd33 Cd37 Cd44 Trem1 Gpr137b Cd68 Serpinb1a Cd74 Cd79a Cd79b Lta Tnf Lef1 Trib1 |
| GO:0030316 | osteoclast differentiation          | Cebpb Cd109 Oscar Tcirlg1 Adam8 Slc9b2 Ccl5 Anxa2 Ocstamp Tnfrsf11a Destamp Tfric Gpr68 Gpr137b Tnf                                                                                                                                                                                                                                                                                                                                                                                                                                                                                                                                                                                                                                                                                                          |
| GO:0002274 | myeloid leukocyte activation        | Hexb Hk3 Abca13 Clec5a Dok3 Oscar Tcirlg1 Chil1 Chit1 Adam8 Haver1 S100a11 Pram1 Fcer1a Mgst1 Fes Ccl5 Plaur Mmp8 Aldh3b1 Mmp9 Hspa1a Hspa1b Alox5 Anxa2 Fpr1 Fpr2 Pparg Hven1 Degs1 Rhog Arsb Slc11a1 Slpi Myo1f Stx11 Il6 Ctsz Cxcr2 Cyba Tarm1 Galns Spi1 Gpr84 Irf4 Destamp Itgal Il18rap Itgb2 Ceacam1 Iqgap1 Blk Neu1 Bst1 Adgre4 Pygl C3 C5ar1 Ckap4 Rac2 Crisp1d2 Pglyrp1 Tom1 Len2 Nfam1 Olr1 Ldlr Gsn Mmp25 Rasgrp1 Thbs1 Cd2 Cd33 Cd37 Tlr1 Cd44 Gpr137b Cd53 Cd68 Serpinb1a Cd74 Tnf Mcempl                                                                                                                                                                                                                                                                                                      |
| GO:0030099 | myeloid cell differentiation        | Rasgrp4 Cebpb Cebpe Clec5a Cd109 Oscar Ets1 Tcirlg1 Adam8 Klf2 Cd101 Slc9b2 Fes Ccl5 Ccr7 Mmp9 Hspa1a Hspa1b Anxa2 Id2 Pparg Csf3r Prkcb Scin Ocstamp Spi1 Inhba Irf4 Tnfrsf11a Destamp Ceacam1C1qc Rara Tfric Thbs1 Gpr68 Gpr137bCd74 Tnf Lef1 Trib1                                                                                                                                                                                                                                                                                                                                                                                                                                                                                                                                                        |

|            |                             |                                                                                                                                                                                                                                                                                                                                                                                                                                                                                                                                                                                                                                                                                                                                                                                                                                                                                                                                                |
|------------|-----------------------------|------------------------------------------------------------------------------------------------------------------------------------------------------------------------------------------------------------------------------------------------------------------------------------------------------------------------------------------------------------------------------------------------------------------------------------------------------------------------------------------------------------------------------------------------------------------------------------------------------------------------------------------------------------------------------------------------------------------------------------------------------------------------------------------------------------------------------------------------------------------------------------------------------------------------------------------------|
| GO:0030098 | lymphocyte differentiation  | Blnk Tcirlg1 Cd83 Adam8 Satb1 Ccr7<br>Mmp14 Ikzf3 Anxa1 Id2 Pou2af1 Zap70<br>Card11 Il1b Il6 Il7r Spi1 Inhba Ccr9<br>Irf4 Vsr Prdm1 Clec4e Gadd45g Pla2g2d<br>Rag1 Gpr18 Rara Pgryrp1 Nfam1 Rasgrp1<br>Lig4 Cd2 Cd3d Cd3e Cd19 Ms4a1<br>Cd80 Cd44 Cd74 Cd79a Cd79b Lef1                                                                                                                                                                                                                                                                                                                                                                                                                                                                                                                                                                                                                                                                        |
| GO:0002443 | leukocyte mediated immunity | Hexb Hfe Hk3 Abca13 Clec5a Ncf1 Dok3 Oscar Tcirlg1<br>Chil1 Chit1 Adam8 S100a11 Pram1 Cadm1 Fcer1a<br>Fcer2a Mgst1 Fes Plaur Mmp8 Aldh3b1 Mmp9 Hspa1a<br>Hspa1b Alox5 Anxa2 Fpr1 Fpr2 Hvcn1 Degs1 Rhog<br>Arb Slc11a1 Ighd Prf1 Slpi Myo1 Igcl1 Igcl2 Igcl3<br>Igl11 Il1b Stx11 Il6 Ctsz Il7r Cxcr2 Cyba Tarm1 Galns<br>Gapt Gpr84 Itgal Ace Il18rap Itgb2 Vsr Ceacam1<br>Iqgap1 Nod2 Blk Neu1 Bst1 Adgre4 C1qc Pygl C3<br>C5ar1 Ckap4 Rac2 Crispld2 Pgryrp1 Ighv1-18 Tom1<br>Lcn2 Nfam1 Olr1 Trdc Gsn TfrC Mmp25 Rasgrp1 Lig4<br>Cd19 Cd33 Cd44 Trem1 Cd53 Cd68 Serpinb1a Cd74<br>Lta Tnf Mcemp1                                                                                                                                                                                                                                                                                                                                              |
| GO:0030098 | lymphocyte differentiation  | Blnk Tcirlg1 Cd83 Adam8 Satb1 Ccr7 Mmp14 Ikzf3<br>Anxa1 Id2 Pou2af1 Zap70 Card11 Il1b Il6 Il7r Spi1<br>Inhba Ccr9 Irf4 Vsr Prdm1 Clec4e Gadd45g Pla2g2d<br>Rag1 Gpr18 Rara Pgryrp1 Nfam1 Rasgrp1 Lig4 Cd2<br>Cd3d Cd3e Cd19 Ms4a1 Cd80 Cd44 Cd74 Cd79a<br>Cd79b Lef1                                                                                                                                                                                                                                                                                                                                                                                                                                                                                                                                                                                                                                                                           |
| GO:0071887 | leukocyte apoptotic process | Adam8 Slc7a11 Ccl5 Ccr7 Anxa1 St6gal1<br>Arg2 Il6 Il7r Cxcr2 Nod2 Blk Rag1<br>Cd44 Cd74 Fcmm                                                                                                                                                                                                                                                                                                                                                                                                                                                                                                                                                                                                                                                                                                                                                                                                                                                   |
| GO:0045321 | leukocyte activation        | Hexb Hfe Cebpb Hk3 Mzb1 H2-DMb2 Abca13 Clec5a<br>Dok3 Oscar Blnk Tcirlg1 Cd83 Chil1 Chit1 Adam8<br>Havcr1 S100a11 Pram1 Cadm1 Fcer1a Satb1 Mgst1<br>Grap2 Zc3h12d Fes Ccl5 Plaur Ccr7 Gpnmb Mmp8<br>Aldh3b1 Mmp9 Mmp14 Hspa1a Hspa1b Alox5 Ikzf3<br>Anxa1 Anxa2 Fpr1 Fpr2 Id2 Pou2af1 Btla Pparg Hvcn1<br>Zap70 Degs1 Arg2 Rhog Arb Slc11a1 Ighd Prf1<br>Tnfsf13b Slpi Myo1f Prkecb Card11 Igcl1 Igcl2 Igcl3<br>Igl11 Il1b Stx11 Il6 Ctsz Il7r Cxcr2 Cyba Tarm1 Galns<br>Spi1 Inhba Ccr9 Spta1 Gapt Gpr84 Irf4 Destamp Itgal<br>Il18rap Sit1 Itgb2 Vsr Ceacam1 Iqgap1 Prdm1 Nod2<br>Blk Cxcr5 Clec4e Neu1 Gadd45g Pla2g2d Bst1 Adgre4<br>Pygl C3 C5ar1 Ckap4 Bank1 Rac2 Crispld2 Rag1<br>Tnfaip812 Gpr18 Rara Pgryrp1 Ighv1-18 Tom1 Cav1<br>Lcn2 Nfam1 Olr1 Ldlr Trdc Gsn TfrC Mmp25 Rasgrp1<br>Lig4 Thbs1 Cd2 Cd3d Cd3e Cd5 Cd8b1 Cd19 Ms4a1<br>Cd22 Cd80 Cd33 Cd37 Tlr1 Cd44 Gpr137b Cd53 Cd68<br>Serpinb1a Cd74 Cd79a Cd79b Tnf Lef1 Mcemp1 |

|            |                       |                                                                                                                                                                                                                                                                                                                                                                                                                                                                                                                                                                                                                                                                                                                                                                                                                           |
|------------|-----------------------|---------------------------------------------------------------------------------------------------------------------------------------------------------------------------------------------------------------------------------------------------------------------------------------------------------------------------------------------------------------------------------------------------------------------------------------------------------------------------------------------------------------------------------------------------------------------------------------------------------------------------------------------------------------------------------------------------------------------------------------------------------------------------------------------------------------------------|
| GO:0006954 | inflammatory response | Hfe Pik3ap1 Pde2a Cebpb Acp5 Ncf1 Blnk<br>Ets1 Tcirlg1 Chil1 Adam8 Fabp4 Acod1<br>Fcer1a Mgst2 Ccl4 Ccl5 Ccr3 Ccr7<br>Ltb4r1 Mmp8 Mmp9 Prdx5 Plp1 Sdc1<br>Alox5 Alox15 Hyal1 Anxa1 Fpr1 Fpr2 Aoah<br>Pparg Slc11a1 Il1b Mapk13 Il6 Cxcr2<br>Cyba Tarm1 Nlrp12 Spp1 Tnfrsf11a Itgal<br>Ace Il18rap Itgb2 Ptgir Ffar4 Nod2<br>Pla2g2d Il1r2 Bst1 C3 C5ar1 Pla2g7<br>Tnfaip812 Cxcr3 Pglyrp1 Nt5e Nlr1 Akna<br>Pstpip1 Nfam1 Cxcl2 Orlr Ldlr Mmp25<br>Rasgrp1 Osm Thbs1 Gpr68 Tlr1 Cd44<br>Trem1 Cd68 Serpinb1a Lta Tnf                                                                                                                                                                                                                                                                                                      |
| GO:0030097 | hemopoiesis           | Rasgrp4 Cebpb Cebpdl Cebpe Arl11 Clec5a<br>Cd109 Oscar Blnk Ets1 Tcirlg1 Cd83<br>Adam8 Klf2 Satb1 Cd101 Slc9b2 Fes Ccl5<br>Ccr7 Mmp9 Mmp14 Rbm47 Hspa1a Hspa1b<br>Ikzf3 Anxa1 Anxa2 Id2 Pou2af1 Pparg<br>Zap70 Csf3r Prkecb Card11 Il1b Scin Il6<br>Il7r Ocstamp Spi1 Inhba Ccr9 Sptal Sptb<br>Irf4 Tnfrsf11a Dcstamp Ace Vsr<br>Ceacam1 Prdm1 Blk Clec4e Gadd45g Pla2g2d<br>C1qc Rag1 Rogdi Gpr18 Rara Pglyrp1<br>Nfam1 Tfrc Rasgrp1 Lig4 Osm Thbs1 Cd2<br>Cd3d Cd3e Cd19 Ms4a1 Cd80 Gpr68<br>Cd44 Gpr137b Cd74 Cd79a Cd79b Tnf Lef1<br>Trib1                                                                                                                                                                                                                                                                            |
| GO:0006952 | defense response      | Hfe Pik3ap1 Pde2a Cebpb Cebpe Clec5a Acp5 Ncf1<br>Blnk Ets1 Tcirlg1 Cd83 Chil1 Slc15a3 Adam8 Fabp4<br>Acod1 Trem14 Cadm1 Fcer1a Mgst2 Fes Ifi30 Ccl4<br>Ccl5 Ccr3 Ccr7 Ltb4r1 Mmp8 Mmp9 Prdx5 Plp1 Sdc1<br>Alox5 Alox15 Hyal1 Anxa1 Fpr1 Fpr2 Aoah Samhd1<br>Pparg Zap70 Arg2 Mst1r Slc11a1 Csf3r Ighd Prf1 Spli<br>Myo1f Card11 Igcl1 Igcl2 Igcl3 Igl1 Il1b Mapk13<br>Stx11 Cd300e Il6 Il7r Cxcr2 Cyba Tarm1 Nlrp12 Msrbl<br>Inhba Spp1 Ccr9 Irf4 Ncf2 Tnfrsf11a Itgal Ace Il18rap<br>Itgb2 Ptgir Ffar4 Ceacam1 Prdm1 Nod2 Blk Clec4e<br>Pla2g2d Il1r2 Bst1 Kenj8 C1qc C3 C5ar1 Pla2g7 Rag1<br>Tnfaip812 Cxcr3 Pglyrp1 Nt5e Ighv1-18 Nlr1 Akna<br>Oas3 Pstpip1 Lcn2 Nfam1 Cxcl2 Orlr Ldlr Trdc Cldn1<br>Ifnlr1 Gsn Mmp25 Rasgrp1 Osm Thbs1 Gpr68 Cd37<br>Tlr1 Cd44 Trem1 Cd68 Serpinb1a Cd74 Irgcl Lsp1 Lta<br>Tnf Fcmmr |
| GO:0045453 | bone resorption       | Acp5 Oscar Tcirlg1 Adam8 Ctsk Il6 Spp1<br>Tnfrsf11a Dcstamp Plekhl1 Rac2 Tfrc Gpr137b                                                                                                                                                                                                                                                                                                                                                                                                                                                                                                                                                                                                                                                                                                                                     |

Table S3. Complete blood count values

| Genotype & Sex                    |                | WBC<br>K/uL | Ne#<br>K/uL | Ly#<br>K/uL | Mo#<br>K/uL | Eo#<br>K/uL | Ba#<br>K/uL | Ne%<br>% | Ly%<br>% | Mo%<br>% | Eo%<br>% | Ba%<br>% | RBC<br>M/uL | HB<br>g/dL | HCT<br>% | MCV<br>fL | MCH<br>Pg | MCHC<br>g/dL | RDW<br>% | PLT<br>K/uL | MPV<br>fL |
|-----------------------------------|----------------|-------------|-------------|-------------|-------------|-------------|-------------|----------|----------|----------|----------|----------|-------------|------------|----------|-----------|-----------|--------------|----------|-------------|-----------|
|                                   | <i>control</i> | 17.32       | 9.83        | 6.15        | 0.39        | 0.16        | 0.79        | 56.73    | 36       | 2.26     | 0.95     | 4.55     | 9.09        | 16.3       | 52.6     | 57.9      | 17.9      | 31           | 26.1     | 967         | 7.6       |
| WT Female                         | 1              | 7.16        | 1.34        | 5.54        | 0.22        | 0.04        | 0.01        | 18.72    | 77.4     | 3.12     | 0.57     | 0.16     | 9.97        | 13.8       | 53.3     | 53.5      | 13.8      | 25.9         | 16.5     | 802         | 4.2       |
|                                   | 2              | 9.02        | 1.21        | 7.12        | 0.58        | 0.09        | 0.02        | 13.44    | 78.9     | 6.38     | 1.04     | 0.22     | 10.18       | 14.4       | 53.1     | 52.2      | 14.1      | 27.1         | 17.4     | 739         | 4.4       |
|                                   | 3              | 9.16        | 0.76        | 7.64        | 0.74        | 0.02        | 0.01        | 8.29     | 83.4     | 8.07     | 0.19     | 0.07     | 10.5        | 14.8       | 56.5     | 53.8      | 14.1      | 26.2         | 16.5     | 695         | 4.3       |
|                                   | 4              | 10          | 1.17        | 8.27        | 0.51        | 0.03        | 0.01        | 11.73    | 82.7     | 5.09     | 0.32     | 0.13     | 10.8        | 14.7       | 55.6     | 51.5      | 13.6      | 26.4         | 17.2     | 614         | 4.4       |
|                                   | 5              | 10.14       | 1.1         | 8.46        | 0.45        | 0.1         | 0.03        | 10.86    | 83.4     | 4.42     | 0.99     | 0.29     | 9.78        | 14.5       | 51.9     | 53.1      | 14.8      | 27.9         | 17.1     | 642         | 4.3       |
|                                   | Mean           | 9.096       | 1.12        | 7.406       | 0.5         | 0.06        | 0.02        | 12.61    | 81.2     | 5.42     | 0.62     | 0.17     | 10.25       | 14.4       | 54.1     | 52.8      | 14.1      | 26.7         | 16.9     | 698         | 4.32      |
|                                   | SD             | 1.19        | 0.22        | 1.17        | 0.19        | 0.04        | 0.01        | 3.89     | 2.81     | 1.89     | 0.38     | 0.08     | 0.409       | 0.39       | 1.9      | 0.95      | 0.45      | 0.803        | 0.42     | 75.3        | 0.08      |
| <i>Sost</i> <sup>-/-</sup> Female | 11             | 7.28        | 1.66        | 5.09        | 0.46        | 0.06        | 0.01        | 22.76    | 69.9     | 6.34     | 0.81     | 0.17     | 9.44        | 13.4       | 53.1     | 56.2      | 14.2      | 25.2         | 16.5     | 659         | 4.7       |
|                                   | 12             | 5           | 0.27        | 4.34        | 0.32        | 0.04        | 0.02        | 5.47     | 86.9     | 6.35     | 0.79     | 0.5      | 8.72        | 13.3       | 47.4     | 54.4      | 15.3      | 28.1         | 18       | 549         | 4.7       |
|                                   | 13             | 7.68        | 0.93        | 6.27        | 0.38        | 0.07        | 0.02        | 12.15    | 81.7     | 4.92     | 0.94     | 0.3      | 9.21        | 13.9       | 50.5     | 54.8      | 15.1      | 27.5         | 17.8     | 607         | 4.7       |
|                                   | 14             | 4.26        | 0.49        | 3.26        | 0.46        | 0.03        | 0.01        | 11.6     | 76.5     | 10.9     | 0.82     | 0.23     | 8.77        | 14.2       | 47.8     | 54.5      | 16.2      | 29.7         | 18.8     | 606         | 5         |
|                                   | 15             | 6.42        | 0.77        | 5.03        | 0.52        | 0.08        | 0.02        | 12.02    | 78.3     | 8.09     | 1.3      | 0.3      | 10.25       | 14.1       | 58.2     | 56.8      | 13.8      | 24.2         | 16.8     | 570         | 4.6       |
|                                   | Mean           | 6.128       | 0.82        | 4.798       | 0.43        | 0.06        | 0.02        | 12.8     | 78.6     | 7.32     | 0.93     | 0.3      | 9.278       | 13.8       | 51.4     | 55.3      | 14.9      | 26.94        | 17.6     | 598         | 4.74      |
|                                   | SD             | 1.465       | 0.53        | 1.105       | 0.08        | 0.02        | 0.01        | 6.233    | 6.29     | 2.3      | 0.21     | 0.12     | 0.622       | 0.41       | 4.44     | 1.09      | 0.95      | 2.226        | 0.93     | 42          | 0.15      |
| WT Male                           | 6              | 18.04       | 4.2         | 13.33       | 0.39        | 0.08        | 0.04        | 23.29    | 73.9     | 2.16     | 0.45     | 0.2      | 10.27       | 14.2       | 52.8     | 51.4      | 13.8      | 26.9         | 18.1     | 927         | 4.3       |
|                                   | 7              | 16.38       | 2.57        | 13.15       | 0.57        | 0.07        | 0.01        | 15.72    | 80.3     | 3.5      | 0.42     | 0.09     | 10.14       | 13.7       | 52.5     | 51.8      | 13.5      | 26.1         | 17.5     | 887         | 4.3       |
|                                   | 8              | 16.86       | 2.27        | 13.72       | 0.74        | 0.1         | 0.03        | 13.44    | 81.4     | 4.4      | 0.6      | 0.15     | 10.12       | 13.7       | 51.5     | 50.9      | 13.5      | 26.6         | 16.9     | 817         | 4.2       |
|                                   | 9              | 17.98       | 2.09        | 14.9        | 0.91        | 0.07        | 0.01        | 11.61    | 82.9     | 5.05     | 0.4      | 0.07     | 10.86       | 14.9       | 57.2     | 52.7      | 13.7      | 26           | 17.3     | 746         | 4.1       |
|                                   | 10             | 11.02       | 0.41        | 10.04       | 0.51        | 0.04        | 0.02        | 3.76     | 91.1     | 4.61     | 0.34     | 0.17     | 5.65        | 7.6        | 29       | 51.3      | 13.5      | 26.2         | 16.3     | 503         | 4.2       |
|                                   | Mean           | 16.06       | 2.31        | 13.03       | 0.62        | 0.07        | 0.02        | 13.56    | 81.9     | 3.94     | 0.44     | 0.14     | 9.408       | 12.8       | 48.6     | 51.6      | 13.6      | 26.36        | 17.2     | 776         | 4.22      |
|                                   | SD             | 2.905       | 1.35        | 1.804       | 0.2         | 0.02        | 0.01        | 7.057    | 6.18     | 1.15     | 0.1      | 0.05     | 2.122       | 2.96       | 11.2     | 0.68      | 0.14      | 0.378        | 0.67     | 168         | 0.08      |
| <i>Sost</i> <sup>-/-</sup> Male   | 16             | 11          | 1.06        | 9.2         | 0.65        | 0.07        | 0.02        | 9.61     | 83.6     | 5.93     | 0.65     | 0.2      | 9.47        | 13.2       | 51.7     | 54.6      | 13.9      | 25.5         | 17.8     | 774         | 4.7       |
|                                   | 17             | 11.62       | 1.02        | 9.78        | 0.72        | 0.08        | 0.02        | 8.76     | 84.1     | 6.23     | 0.69     | 0.18     | 9.8         | 13.8       | 53.7     | 54.8      | 14.1      | 25.7         | 17.3     | 640         | 4.3       |
|                                   | 18             | 11.96       | 1.38        | 9.58        | 0.86        | 0.09        | 0.04        | 11.56    | 80.1     | 7.2      | 0.78     | 0.35     | 9.09        | 13.9       | 47.6     | 52.4      | 15.3      | 29.2         | 18.1     | 782         | 4.5       |
|                                   | 19             | 10.44       | 0.57        | 9.15        | 0.68        | 0.02        | 0.02        | 5.5      | 87.7     | 6.52     | 0.16     | 0.15     | 9.14        | 13.4       | 49.6     | 54.3      | 14.7      | 27           | 19.5     | 643         | 4.4       |
|                                   | 20             | 12.24       | 0.81        | 10.62       | 0.79        | 0.02        | 0           | 6.62     | 86.8     | 6.42     | 0.18     | 0.04     | 9.28        | 13.4       | 49.3     | 53.1      | 14.4      | 27.2         | 18.6     | 627         | 4.5       |
|                                   | Mean           | 11.45       | 0.97        | 9.666       | 0.74        | 0.06        | 0.02        | 8.41     | 84.5     | 6.46     | 0.49     | 0.18     | 9.356       | 13.5       | 50.4     | 53.8      | 14.5      | 26.92        | 18.3     | 693         | 4.48      |
|                                   | SD             | 0.731       | 0.3         | 0.595       | 0.09        | 0.03        | 0.01        | 2.406    | 2.97     | 0.47     | 0.3      | 0.11     | 0.289       | 0.3        | 2.36     | 1.04      | 0.55      | 1.482        | 0.84     | 77.7        | 0.15      |

\*Highlighted means are to show where WT and *Sost*<sup>-/-</sup> are statistically different, compared by sex, using students ttest p<0.05

**Table S4. Antibodies used for flow cytometry**

| <b>Specificity</b> | <b>Clone</b> | <b>Fluorochrome</b> |
|--------------------|--------------|---------------------|
| Annexin V          |              | APC                 |
| Annexin V          |              | FITC                |
| 7AAD               |              |                     |
| CD11b              | M1/70        | Biotin              |
| CD127 (Il7ra)      | A7R34        | Biotin              |
| CD127 (Il7ra)      | A7R34        | PerCP Cy5.5         |
| CD150              | mShad        | FITC                |
| CD16/32            | 93           | PerCP-Cy5.5         |
| CD19               | 6D5          | Biotin              |
| CD19               | 6D5          | PE                  |
| CD3                | 2C11         | Biotin              |
| CD3                | 2C11         | APC                 |
| CD31               | 390          | APC                 |
| CD34               | RAM34        | FITC                |
| CD4                | Gk1.5        | Biotin              |
| CD41               | MWReg30      | BUV395              |
| CD45               | 30-F11       | APC-Cy7             |
| CD45               | 30-F11       | PerCP Cy5.5         |
| CD45.1             | A20          | FITC                |
| CD45.1             | A20          | PE                  |
| CD45.1             | A20          | PerCP-Cy5.5         |
| CD45.2             | 104          | APC-Cy7             |
| CD45R (B220)       | RA3-6B2      | Biotin              |
| CD48               | HM48         | PE-Cy7              |
| CD48               | HM48         | APC                 |
| CD5                | 53-7.3       | Biotin              |
| CD51               | RMV-7        | Biotin              |
| CD8                | 53.6.7       | Biotin              |
| cKit               | 2B8          | APC                 |
| cKit               | 2B8          | APC                 |
| F4/80              | BM8          | Biotin              |
| Flk2               | A2F10        | PE                  |
| Gr1                | RB6-8C3      | Biotin              |
| Gr1                | RB6-8C3      | PE-Cy7              |
| Ki67               | SolA15       | APC                 |
| NK1.1              | PK136        | Biotin              |
| Scal               | D7           | BV510               |
| Scal               | D7           | FITC                |
| Streptavidin       |              | PerCP Cy5.5         |
| Streptavidin       |              | PacBlue             |
| Streptavidin       |              | PE                  |
| Ter119             | TER119       | Biotin              |
| Ter119             | TER119       | BV421               |

**Table S5. List of Cell Surface Markers used for Flow Cytometry**

| <b>Cell Type</b>          | <b>Markers</b>                                             |                    |                   |                   |                  |
|---------------------------|------------------------------------------------------------|--------------------|-------------------|-------------------|------------------|
| Transplanted LT-HSCs      | Lin <sup>-</sup> Sca1 <sup>+</sup> cKit <sup>+</sup> (LSK) | CD150 <sup>+</sup> | CD48 <sup>-</sup> |                   |                  |
| All other LT-HSC          | Lin <sup>-</sup> Sca1 <sup>+</sup> cKit <sup>+</sup> (LSK) | CD150 <sup>+</sup> | CD48 <sup>-</sup> | Flk2 <sup>-</sup> |                  |
| ST-HSCs                   | Lin <sup>-</sup> Sca1 <sup>+</sup> cKit <sup>+</sup> (LSK) | CD150 <sup>-</sup> | CD48 <sup>-</sup> | Flk2 <sup>-</sup> |                  |
| MPP2                      | Lin <sup>-</sup> Sca1 <sup>+</sup> cKit <sup>+</sup> (LSK) | CD150 <sup>+</sup> | CD48 <sup>+</sup> | Flk2 <sup>-</sup> |                  |
| MPP3                      | Lin <sup>-</sup> Sca1 <sup>+</sup> cKit <sup>+</sup> (LSK) | CD150 <sup>-</sup> | CD48 <sup>+</sup> | Flk2 <sup>-</sup> |                  |
| MPP4                      | Lin <sup>-</sup> Sca1 <sup>+</sup> cKit <sup>+</sup> (LSK) | CD150 <sup>-</sup> | CD48 <sup>+</sup> | Flk2 <sup>+</sup> |                  |
| T Cells                   | Gr1 <sup>-</sup>                                           | CD3 <sup>+</sup>   | CD19 <sup>-</sup> |                   |                  |
| B Cells                   | Gr1 <sup>-</sup>                                           | CD3 <sup>-</sup>   | CD19 <sup>+</sup> |                   |                  |
| Monocytes                 | CD3 <sup>-</sup>                                           | CD11b <sup>+</sup> | Gr1 <sup>-</sup>  |                   |                  |
| Granulocytes              | CD3 <sup>-</sup>                                           | CD11b <sup>+</sup> | Gr1 <sup>+</sup>  |                   |                  |
| B Cell, Fraction A (BM)   | B220 <sup>+</sup> CD43 <sup>+</sup>                        | cKit <sup>-</sup>  | CD19 <sup>-</sup> |                   |                  |
| B Cell, Fraction B-C (BM) | B220 <sup>+</sup> CD43 <sup>+</sup>                        | cKit <sup>-</sup>  | CD19 <sup>+</sup> |                   |                  |
| B Cell, Fraction D (BM)   | B220 <sup>+</sup> CD43 <sup>-</sup>                        | cKit <sup>-</sup>  | CD19 <sup>+</sup> | IgM <sup>-</sup>  | IgD <sup>-</sup> |
| B Cell, Fraction E (BM)   | B220 <sup>+</sup> CD43 <sup>-</sup>                        | cKit <sup>-</sup>  | CD19 <sup>+</sup> | IgM <sup>+</sup>  | IgD <sup>-</sup> |
| B Cell, Fraction F (BM)   | B220 <sup>+</sup> CD43 <sup>-</sup>                        | cKit <sup>-</sup>  | CD19 <sup>+</sup> | IgD <sup>+</sup>  |                  |
| B Cell (Spleen)           | B220 <sup>+</sup>                                          | CD19 <sup>+</sup>  |                   |                   |                  |
| B Cell (Spleen)           | B220 <sup>+</sup>                                          | IgM <sup>+</sup>   |                   |                   |                  |
| Mesenchymal stromal cell  | Lin <sup>-</sup> , CD45 <sup>-</sup>                       | CD31 <sup>-</sup>  | Sca1 <sup>+</sup> | CD51 <sup>+</sup> |                  |
| Osteoblasts               | Lin <sup>-</sup> , CD45 <sup>-</sup>                       | CD31 <sup>-</sup>  | Sca1 <sup>-</sup> | CD51 <sup>+</sup> |                  |
| Endothelial cell          | Lin <sup>-</sup> , CD45 <sup>-</sup>                       | CD31 <sup>+</sup>  | Sca1 <sup>+</sup> |                   |                  |
| "Other" Bone cell         | Lin <sup>-</sup> , CD45 <sup>-</sup>                       | CD31 <sup>-</sup>  | Sca1 <sup>-</sup> | CD51 <sup>-</sup> |                  |

## Supplemental Figure Legends

*Figure S1. Sclerostin-depleting antibodies change hematopoietic differentiation.* (A) Bone marrow cellularity of HSPCs in PBS vs Scl-Ab treatment (B) Bone marrow cellularity of mature lineages of PBS vs Scl-Ab treatment (C) Splenic cellularity of HSPCs in PBS vs Scl-Ab treatment (D) Splenic cellularity of mature lineages of PBS vs Scl-Ab treatment (E) Bone marrow frequency of B cell populations (F) Splenic frequency of B cell populations (G) Bone marrow cellularity of B cell populations (H) Splenic cellularity of B cell populations Mice were 8 weeks of age at start of treatment, female C57B6. 7 mice received PBS, 7 mice received Scl-Ab antibody.

*Figure S2. Analysis of LT-HSC frequency and cellularity in  $Sost^{-/-}$  mice.* (A) Bone marrow frequency of HSPCs in WT and  $Sost^{-/-}$  mice (B) Bone marrow cellularity of HSPCs in  $Sost^{-/-}$  mice (C) Splenic frequency of HSPCs in WT and  $Sost^{-/-}$  mice (D) Splenic cellularity of HSPCs in  $Sost^{-/-}$  mice. Mice ages ranged from 14-40 weeks of age, with equal male and female numbers for each age (2-4 mice per sample and time point).

*Figure S3. Proliferation and cell death are altered in  $Sost^{-/-}$  bone marrow and spleens.* (A) Donor cellularity of BM HSPC progenitors in WT $\rightarrow$  $Sost^{-/-}$  chimeras (B) Donor cellularity of spleen HSPC progenitors in WT $\rightarrow$  $Sost^{-/-}$  chimeras. 5FU analysis consisted of 1 experiment (C) Gene expression of cell cycle genes in LSKs normalized to GAPDH (D) Cell numbers in controls and 5-FU treated animals in 2 independent experiments 5 days after 5FU injection (E) Summary of basal (non-5FU-treated mice) cell cycle analysis in LSKs (F) Summary of cell cycle analysis in WT and  $Sost^{-/-}$  mice in LSKs 5 days after 5-FU injection. LSK frequencies in individual mice are shown as normalized to the mean of the WT 5-FU treated mice. (G) Representative flow cytometry plots of cell cycle analysis on gated LSKs in untreated and 5FU-treated animals. Mice were 17 weeks of age, male and female.

*Figure S4. Hematopoietic progenitors derived from  $Sost^{-/-}$  bone marrow display normal hematopoiesis after transplantation into a WT microenvironment.* WT (CD45.2) $\rightarrow$  WT (CD45.1)(control, black bars) and  $Sost^{-/-}$  (CD45.2) $\rightarrow$  WT (CD45.1) (teal bars) hematopoietic chimeras were prepared to test the function of hematopoietic progenitors derived from  $Sost^{-/-}$  bone marrow donors after transplantation into WT recipients. (A) Percent donor hematopoietic chimerism; (B) Total bone marrow cellularity; (C) Frequency of donor-derived BM LSKs; (D) Frequency of donor-derived splenic LSKs; (E) Frequency of donor-derived BM HSPCs; (F) Frequency of donor-derived splenic HSPCs. The ages of the WT donor mice ranged from 12-15 weeks, ages of  $Sost^{-/-}$  donor mice ranged from 12-17 weeks. Ages of the recipients ranged from 13-15 weeks. Both male and female donors and hosts were used. Analysis of BM was performed 19-20 weeks post-

transplantation. Data shown are compiled from 3 independent experiments. No statistical differences between WT→WT and *Sost*<sup>-/-</sup>→WT chimeras were found ( $p < 0.05$ , Mann-Whitney, non-parametric t-test).

*Figure S5. RNA-Seq heatmap results.* Osteoclast differentiation and bone resorption genes and inflammation genes upregulated in sorted WT LT-HSCs developing in *Sost*<sup>-/-</sup> bone marrow microenvironments (WT→*Sost*<sup>-/-</sup> bone marrow chimeras).

*Figure S6. ScRNA-Seq Analysis of immune cells from the long bones from WT and SostKO mice.* (A) Heatmap showing the expression of top markers of each immune cell clusters as defined in Figure 4 of the manuscript; (B) Feature plots showing the expression of selected cluster markers and *Ptprc* (CD45).

*Figure S7. Analysis of CXCL12 and SCF in bone stromal cells of Sost<sup>-/-</sup> mice.* (A) Representative FACS plots depicting gating strategy for collagenase-digested bones (B) Relative CXCL12 gene expression in *Sost*<sup>-/-</sup> bone cells (C) Relative SCF gene expression in *Sost*<sup>-/-</sup> bone cells (D) Summary of bone cell frequencies after digest of femurs and tibiae of WT (n=14) and KO (n=26) mice.  $p < 0.01^{**}$  Mann-Whitney, non-parametric ttest.

*Figure S8. Evidence of extramedullary hematopoiesis in Sost<sup>-/-</sup> mice.* (A) Spleen weight in WT and *Sost*<sup>-/-</sup> mice. Values represent total spleen weight divided by total mouse weight (B) Splenic pulp area, as calculated by area of indicated pulp type (white or red) divided by total pulp area stained. (C) H&E staining of spleens. Size reference is 500  $\mu$ m. Dark purple round spots are white pulp and pink area is red pulp. (D-G) Data is representative of 4 mice per time point for WT and *Sost*<sup>-/-</sup> mice. (D) LT-HSC frequency analyzed over time in the bone marrow (E) ST-HSC frequency analyzed over time in the bone marrow (F) LT-HSC frequency analyzed over time in the spleen (G) ST-HSC frequency analyzed over time in the spleen. Mice ages ranged from 14-40 weeks of age, with equal male and female numbers for each age (2-4 mice per sample and time point).  $p < 0.05^*$ ,  $p < 0.01^{**}$ ,  $p < 0.001^{***}$  Mann-Whitney, non-parametric ttest.

*Figure S9. LT-HSCs from the spleen show no functional differences compared to the bone marrow.* (A) Experimental schematic of splenic LT-HSCs transplants (B) Bone marrow and splenic cellularity of host transplants (C) Bone marrow and splenic donor chimerism from transplants (D) Bone marrow cellularity of HSPCs from donor (E) Splenic cellularity of HSPCs from donor (F) Bone marrow cellularity of mature lineages from donor (G) Splenic cellularity of mature lineages from donor. Data were collected in 2 separate experiments. Donor ages ranged from 37-49 weeks male or female. Host ages ranged from 11-15 weeks male and female. Transplant time was 19 weeks. Donor LT-HSC cell numbers ranged from 1,000-3,000 LT-HSCs cells per mouse.

## Supplemental References

1. Schepers, K., E. C. Hsiao, T. Garg, M. J. Scott, and E. Passegue. 2012. Activated Gs signaling in osteoblastic cells alters the hematopoietic stem cell niche in mice. *Blood* 120: 3425-3435.
2. Livak, K. J., and T. D. Schmittgen. 2001. Analysis of relative gene expression data using real-time quantitative PCR and the 2(-Delta Delta C(T)) Method. *Methods* 25: 402-408.
3. Cain, C. J., R. Rueda, B. McLelland, N. M. Collette, G. G. Loots, and J. O. Manilay. 2012. Absence of sclerostin adversely affects B-cell survival. *J Bone Miner Res* 27: 1451-1461.

Figure S1

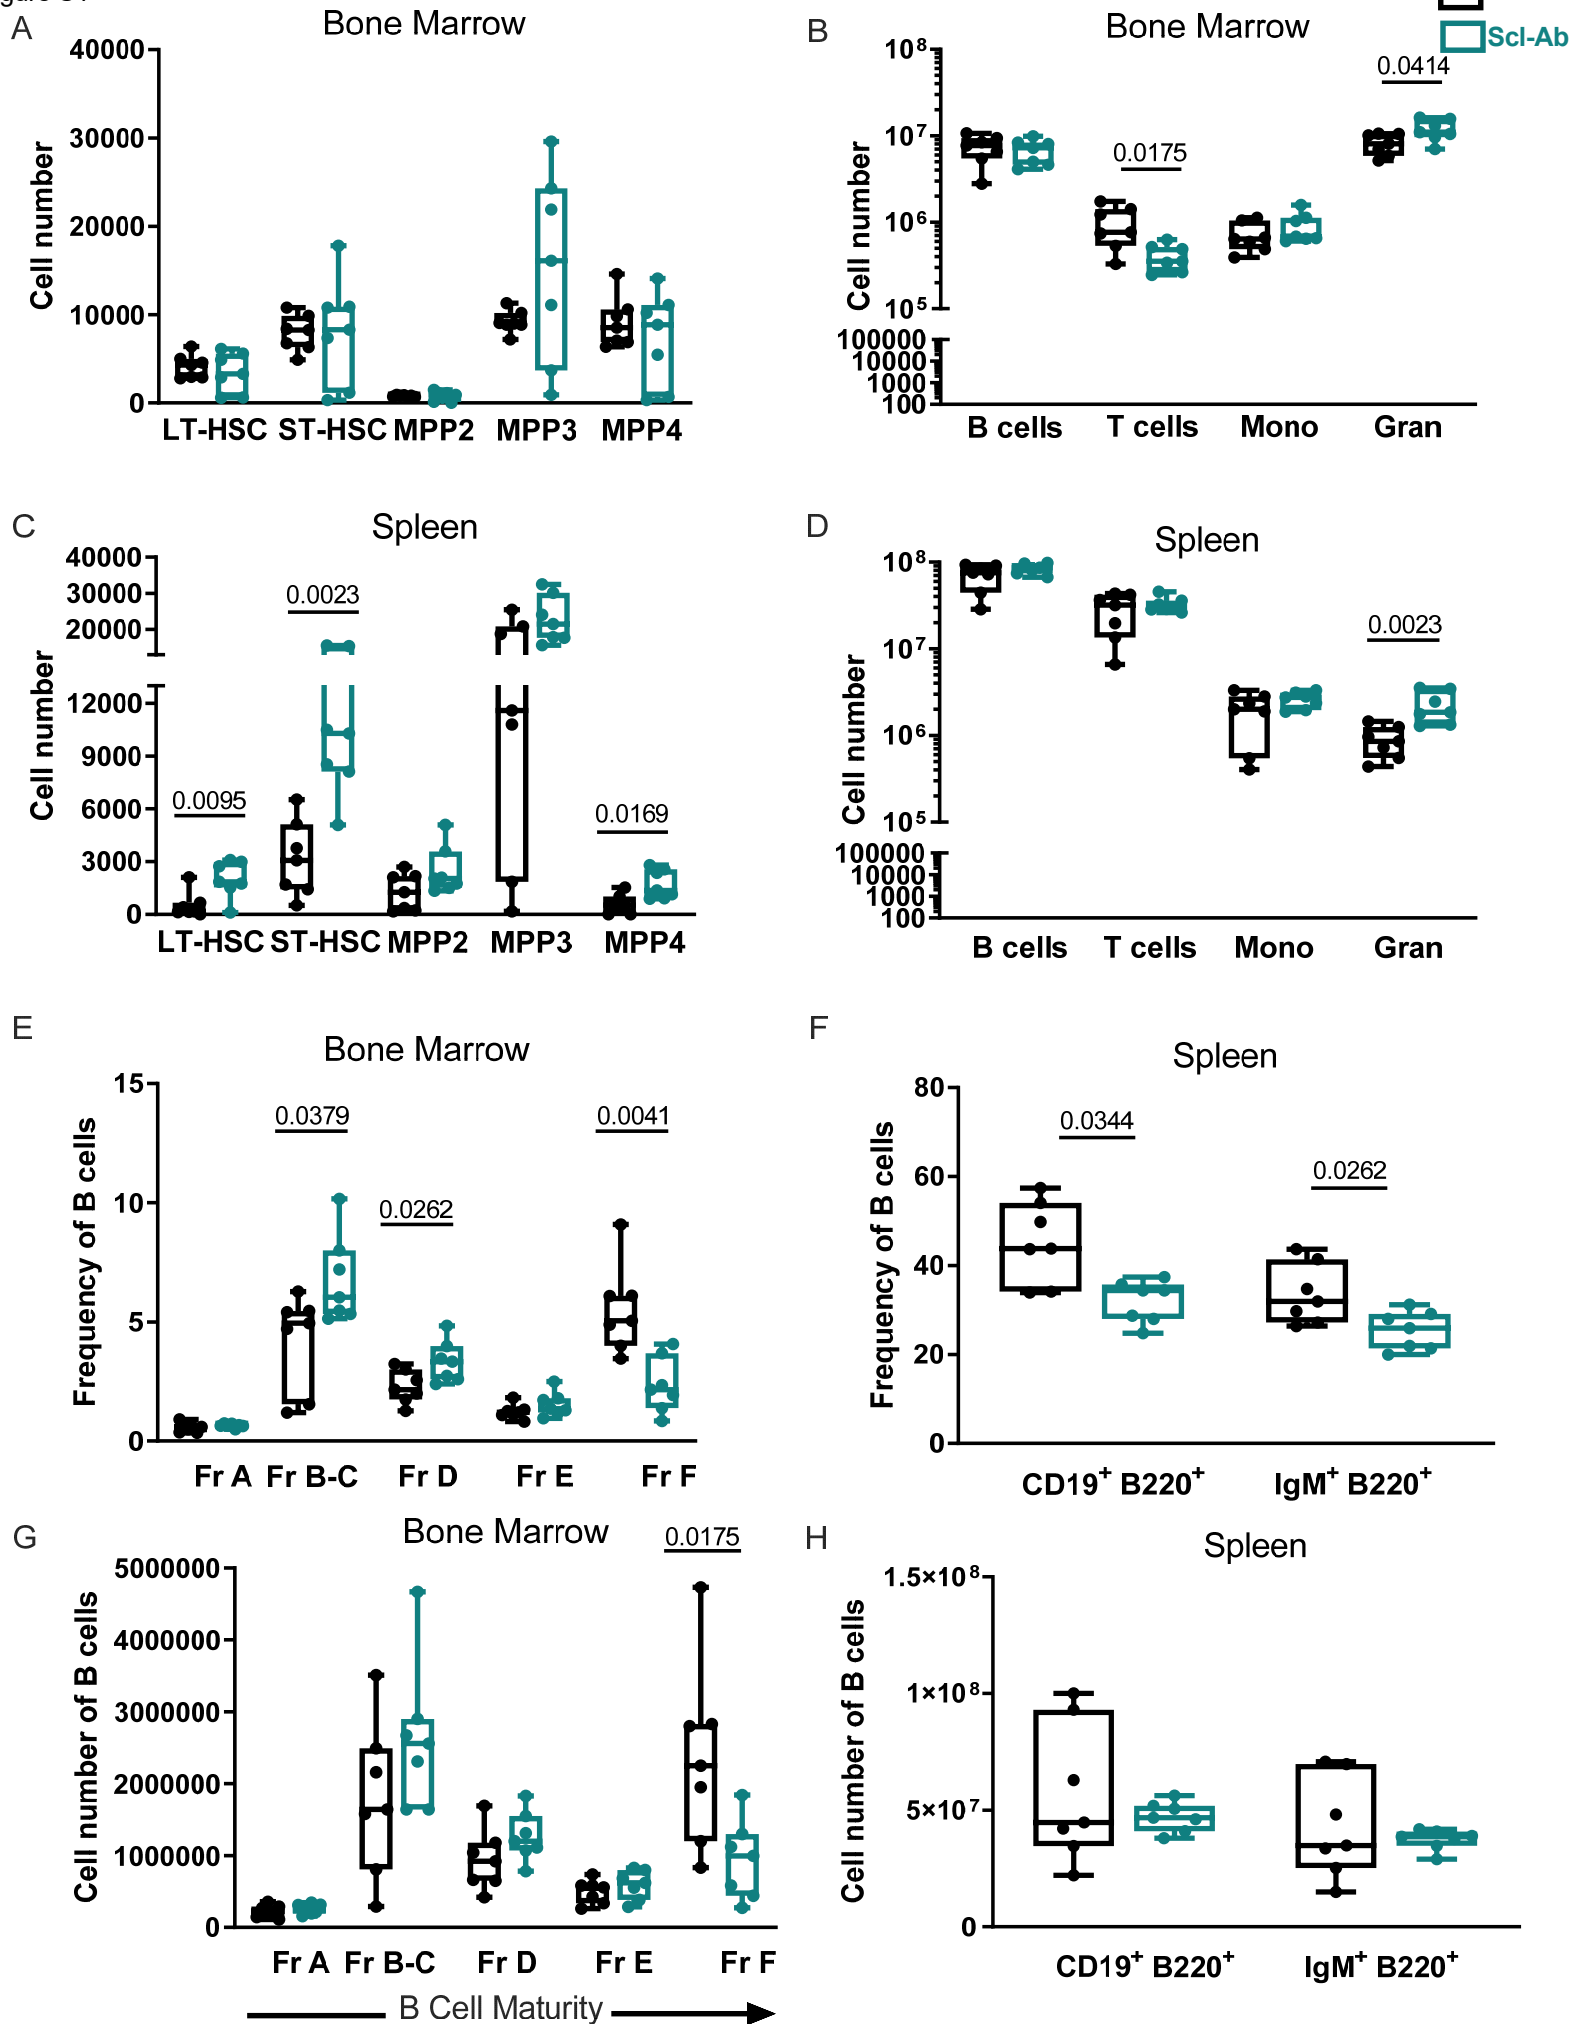

Figure S2

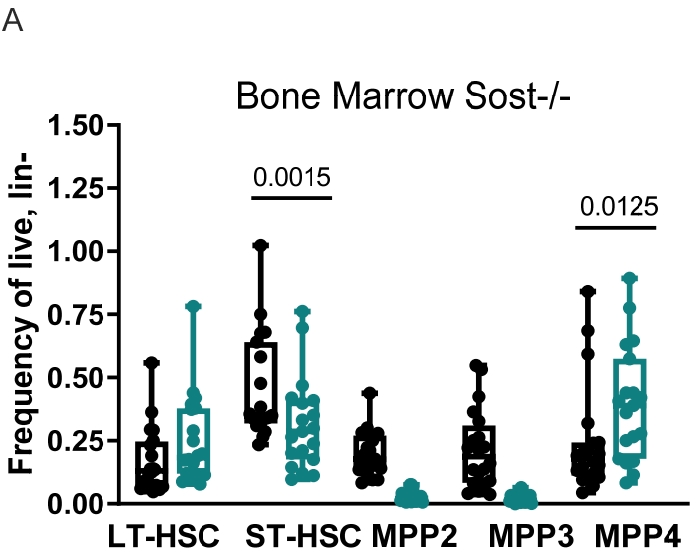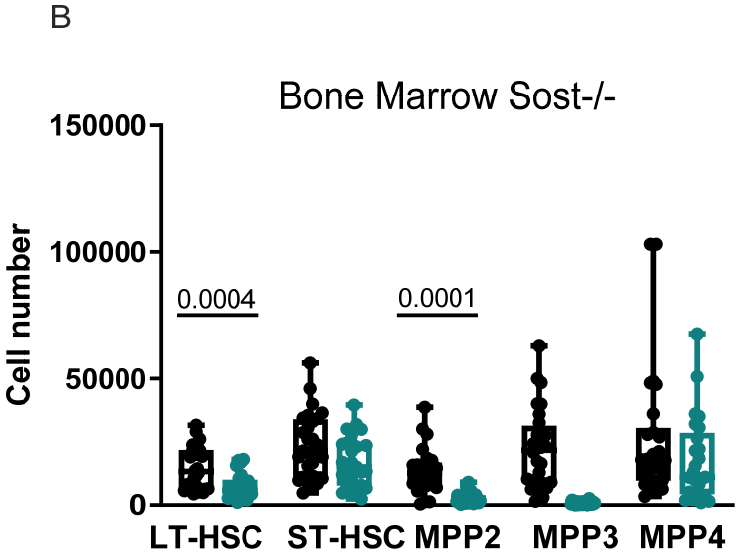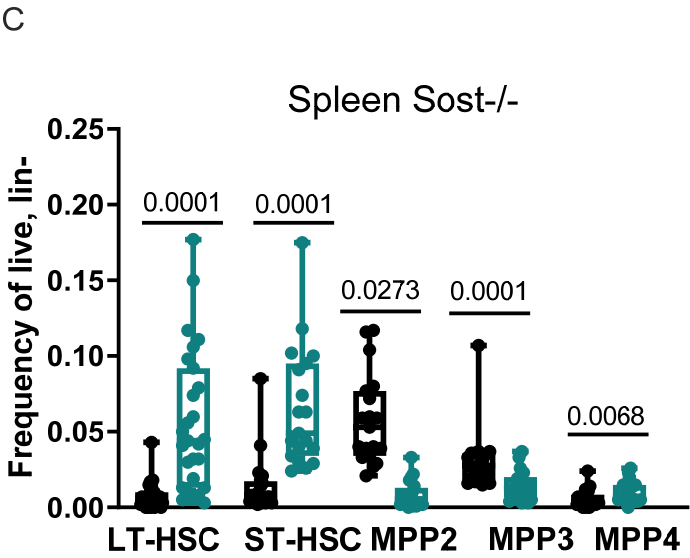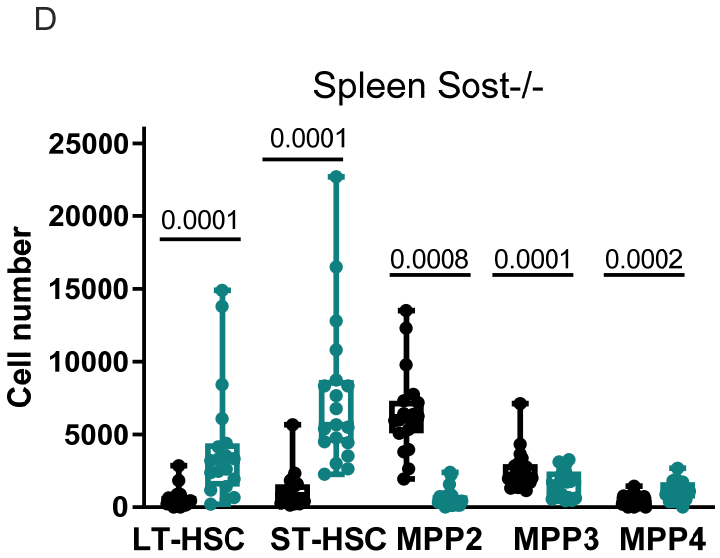

Figure S3

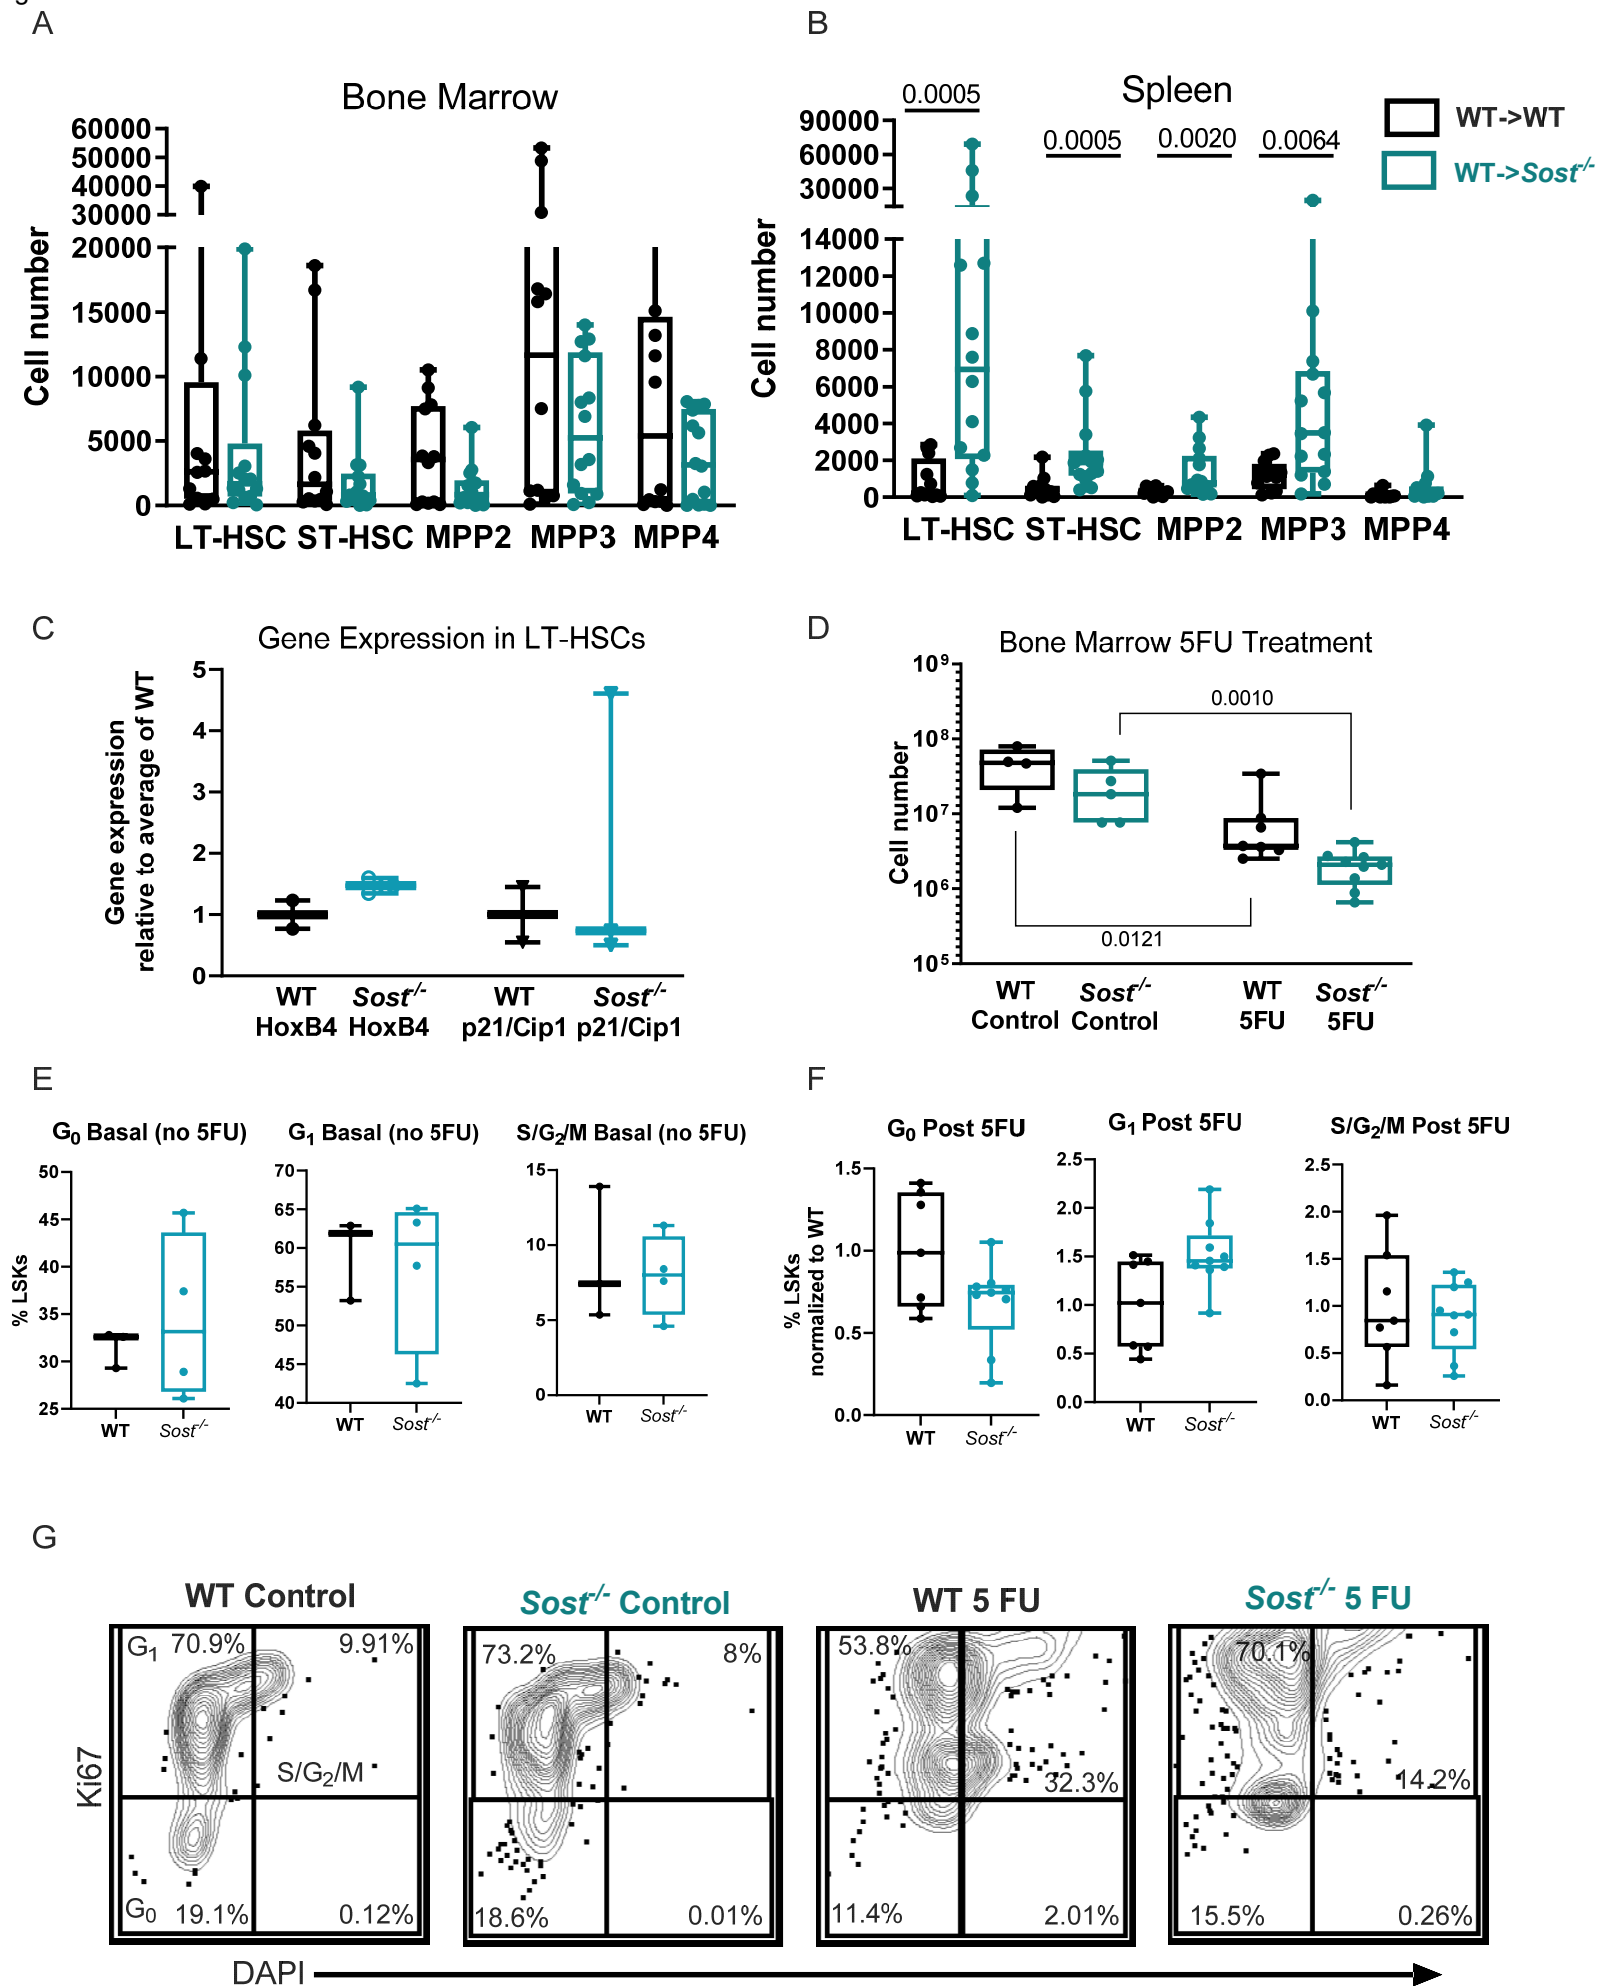

Figure S4

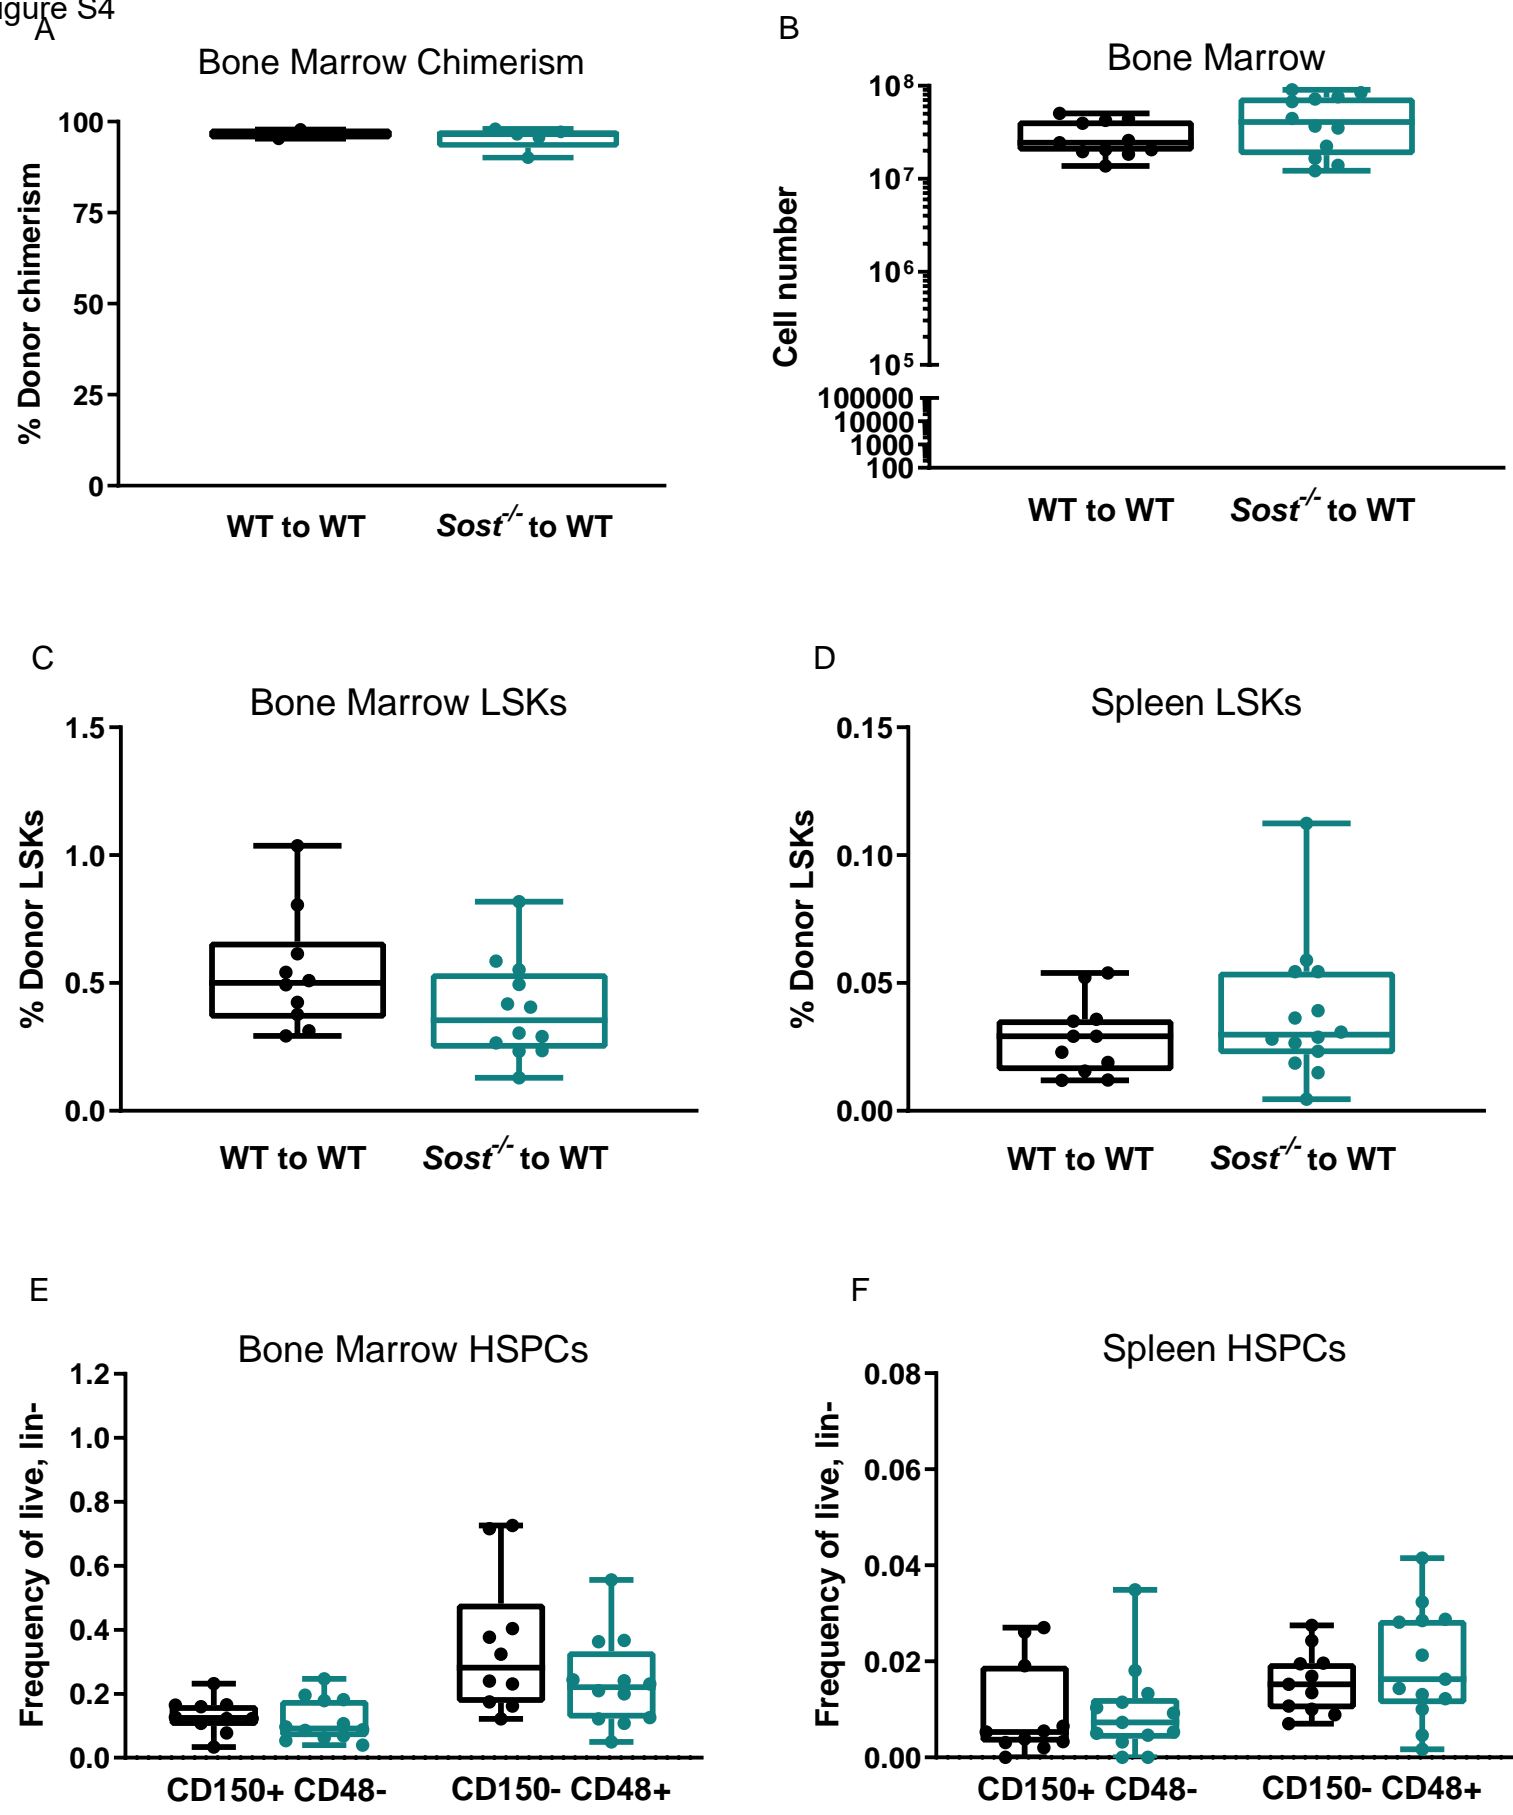

Figure S5

A

Osteoclast differentiation  
and bone resorption

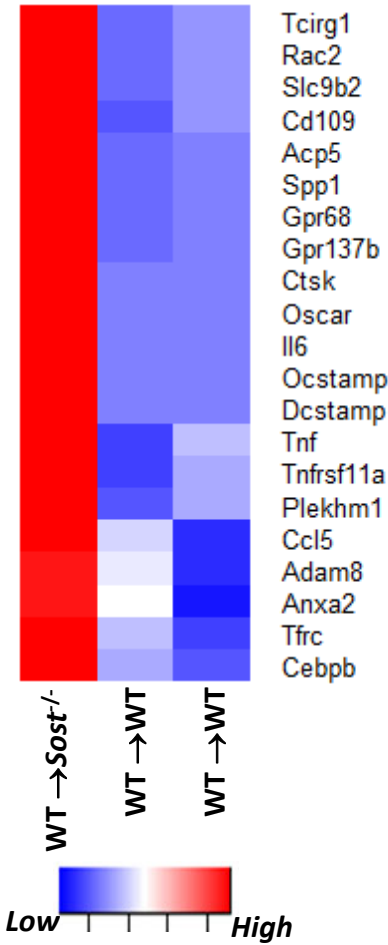

B

Inflammatory response

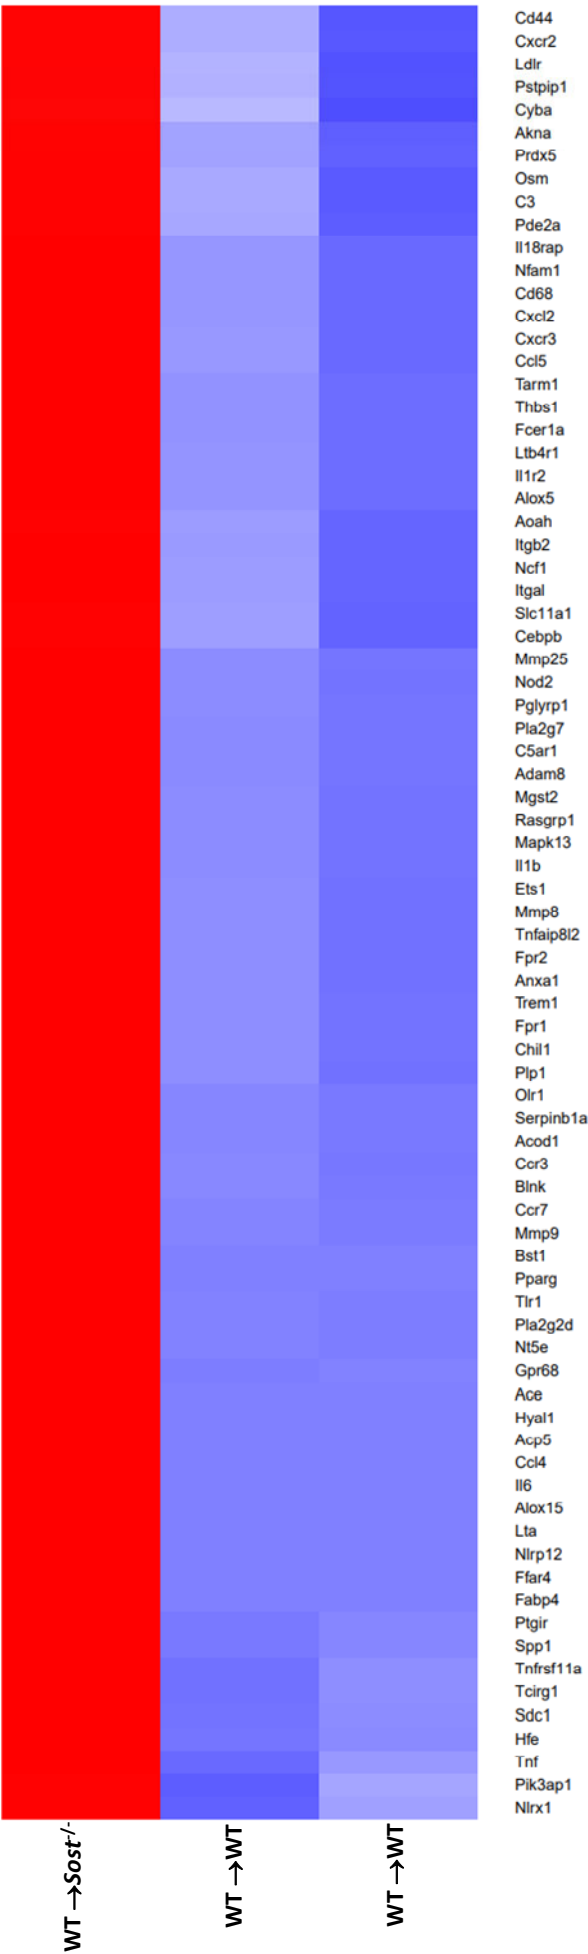

Figure S6

A

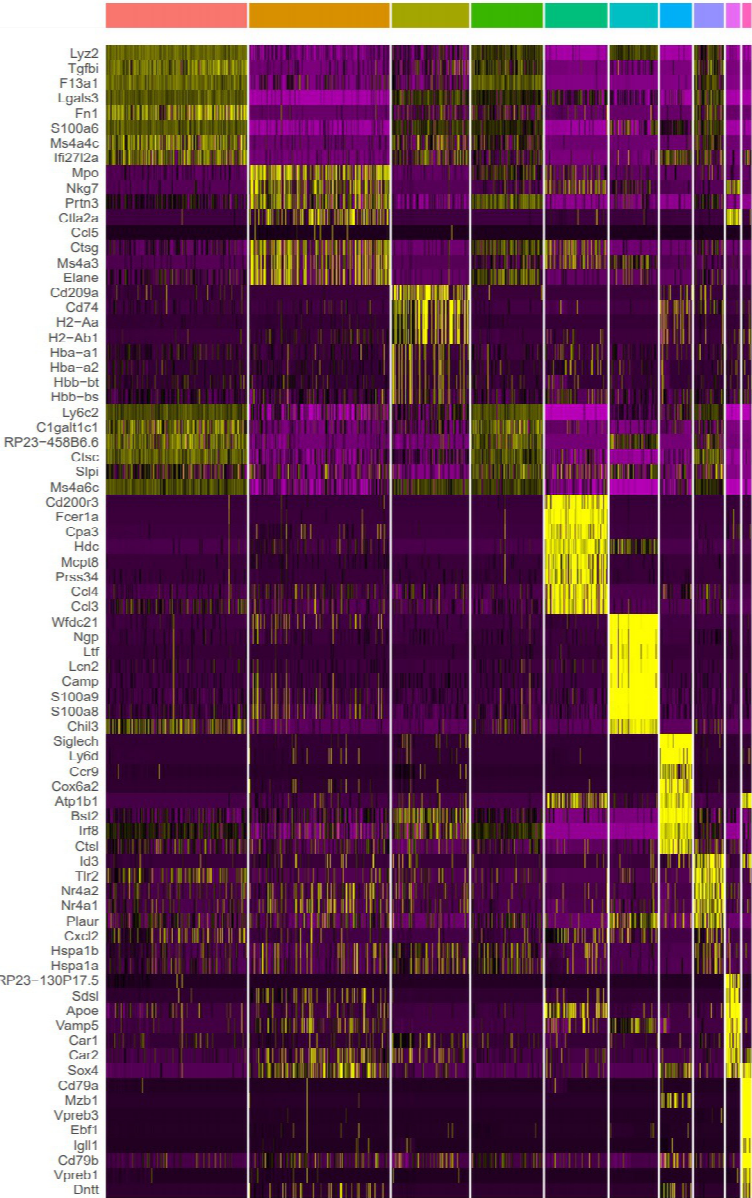

B

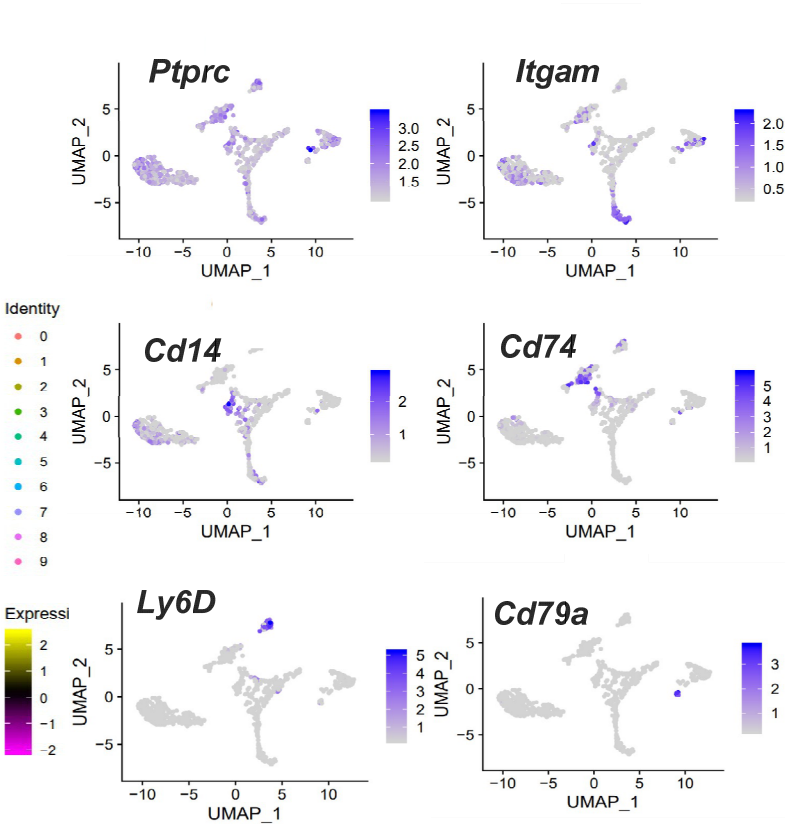

Figure S7

A

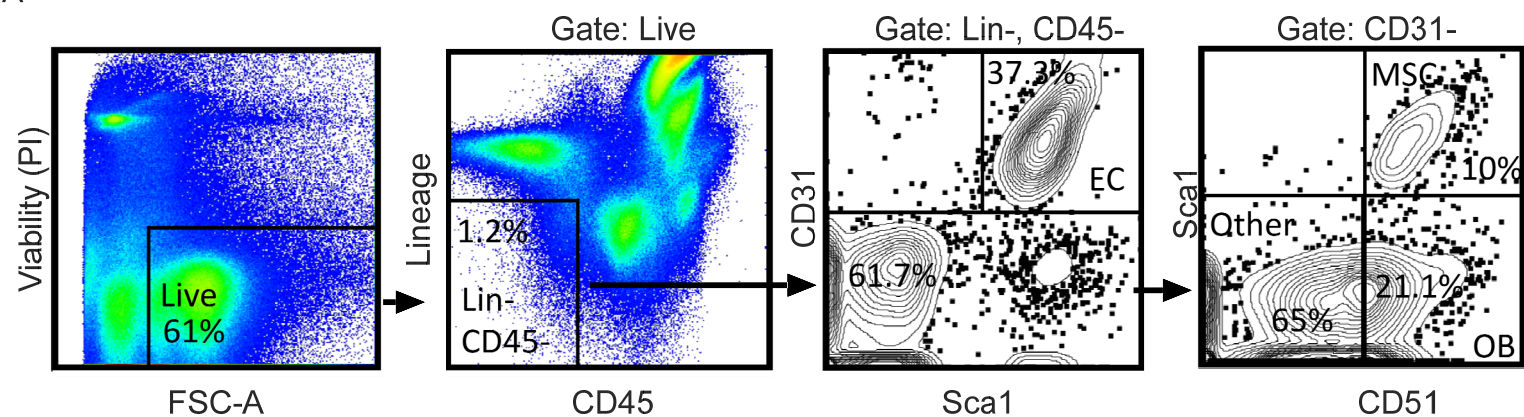

B

CXCL12 Expression in Bone

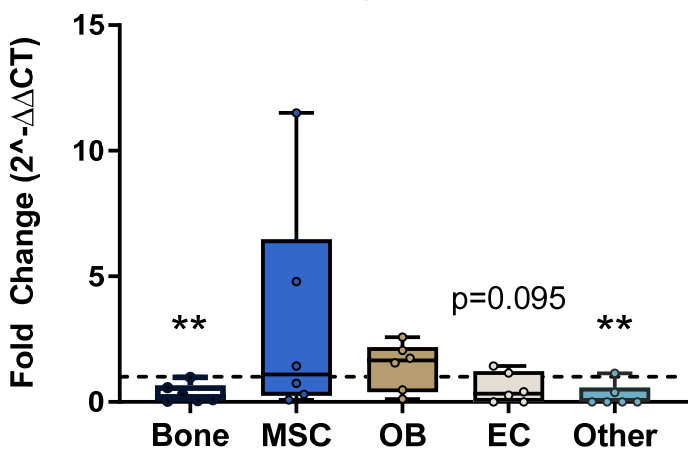

C

SCF Expression in Bone

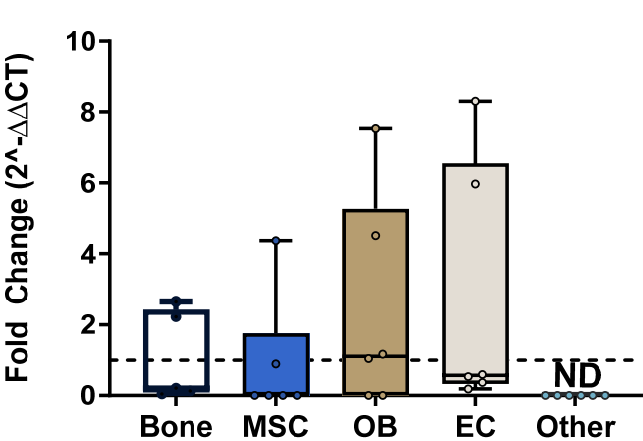

D

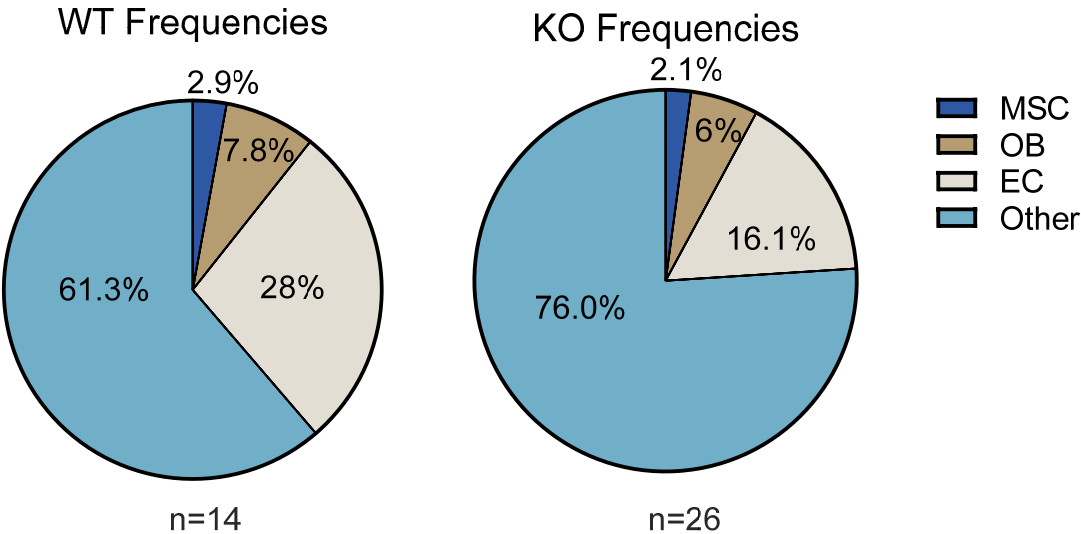

Figure S8

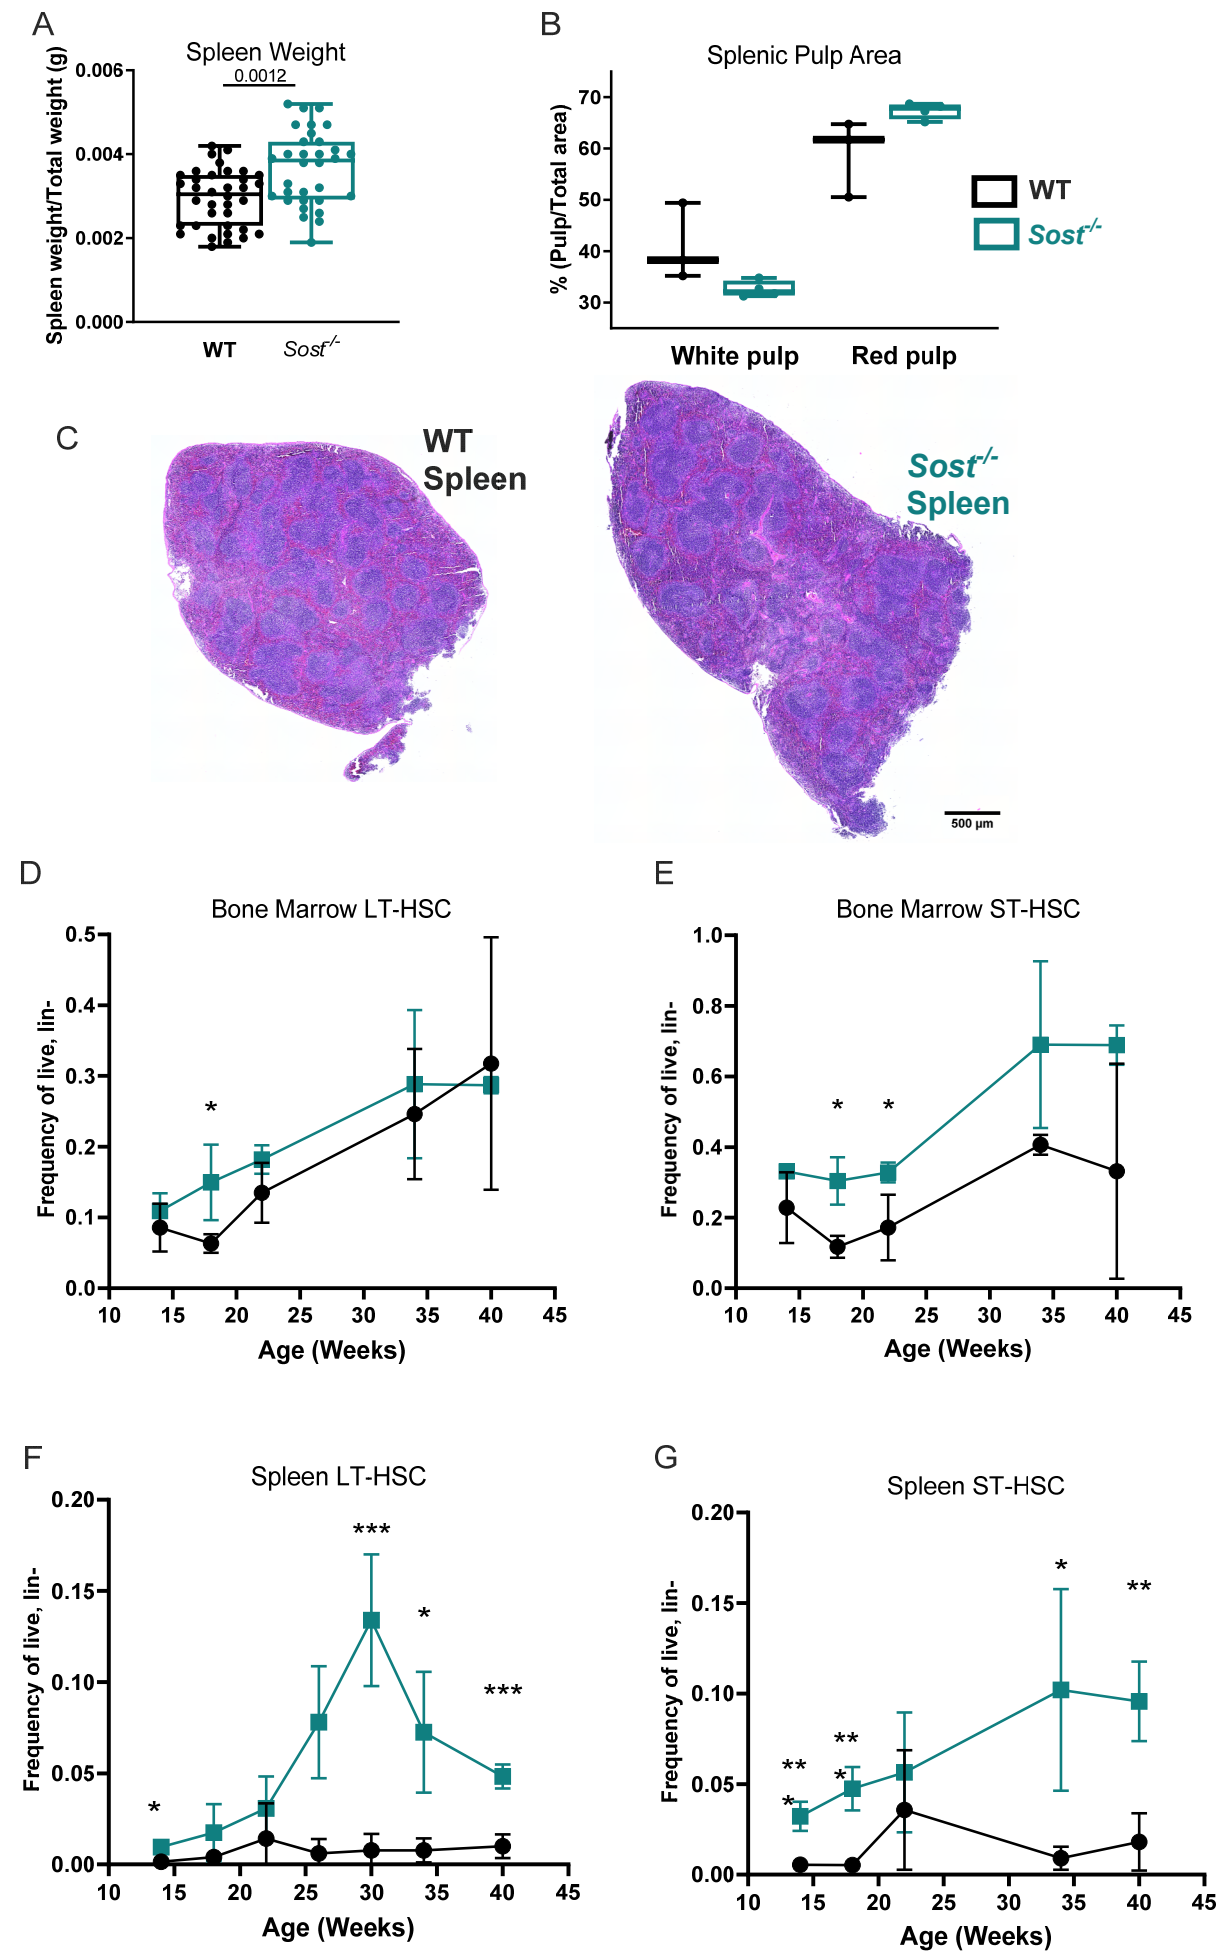

Figure S9

A

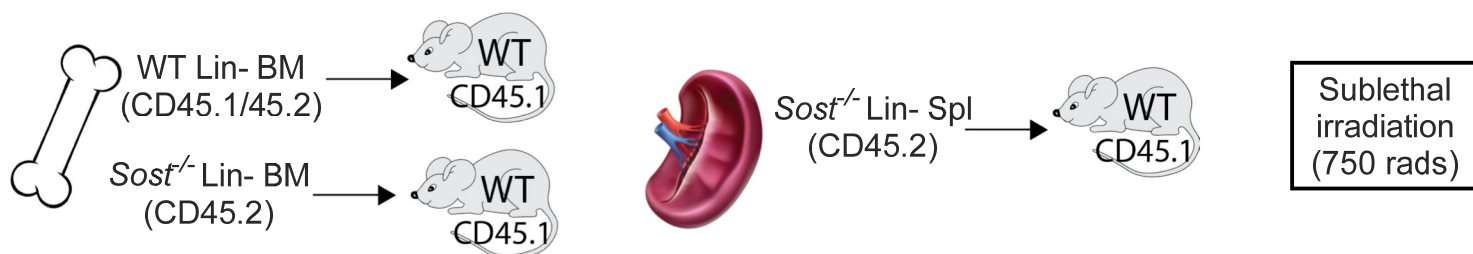

B

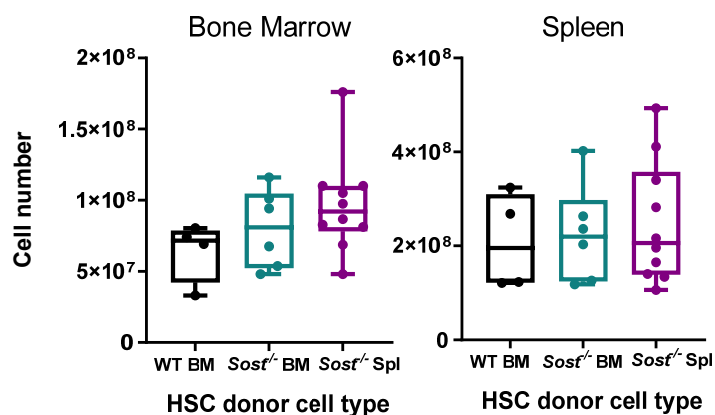

C

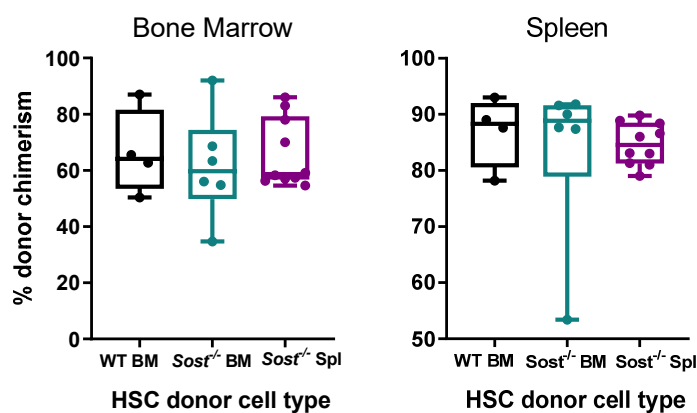

D

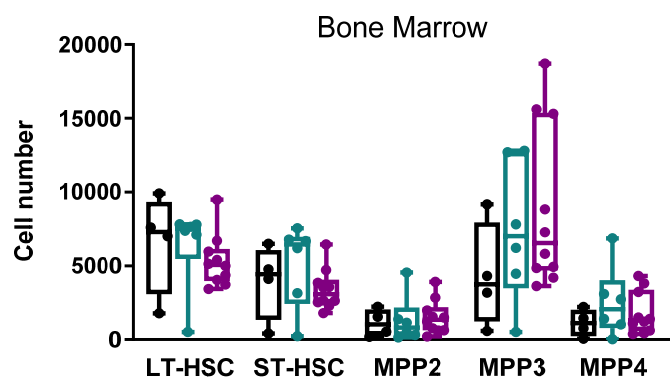

E

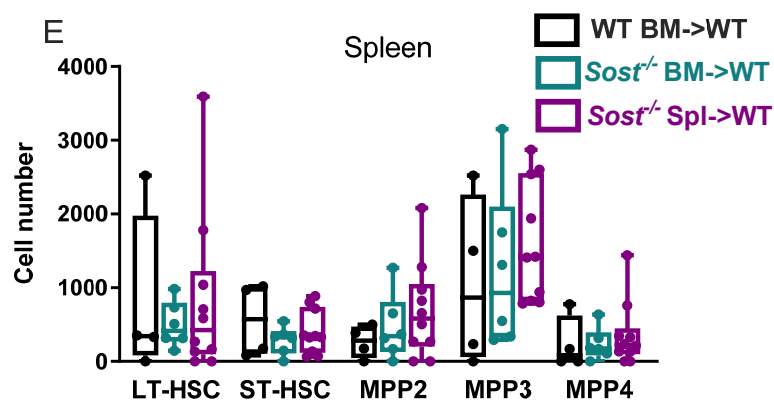

F

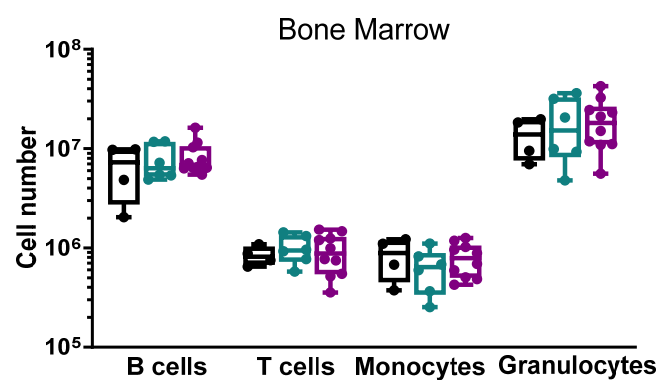

G

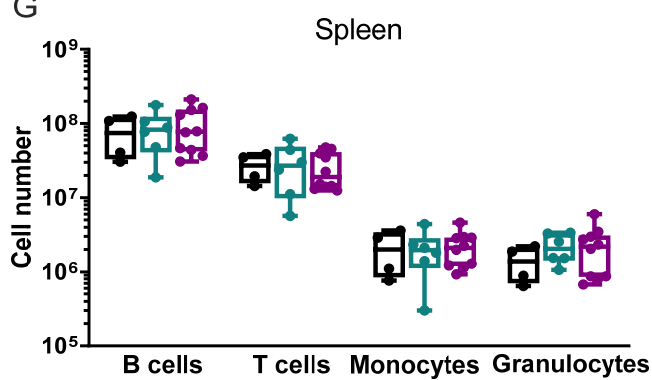

Supplement: Supplementary file 1 [file ijms-22-09111-s001.zip › ijms-1346622-supplementary.pdf]
